# Supplementary material
Source: PubMed Central journal article supplement (PMC2680232)
Supplement: NIHMS103247-supplement-1.pdf [file NIHMS103247-supplement-1.pdf]

## SUPPLEMENTARY INFORMATION

### A Plant 5S Ribosomal RNA Mimic Regulates Alternative Splicing of Transcription Factor IIIA Pre-mRNAs

Ming C. Hammond, Andreas Wachter, and Ronald R. Breaker

#### Table of Contents

##### Supplementary Figures

- Figure 1. Representative sequences for plant 5S rRNA mimic
- Figure 2. Variant P5SM representative in the moss *Physcomitrella patens*
- Figure 3. In-line probing analysis of *Oryza sativa* P5SM RNAs
- Figure 4. Sequences of TFIIIA gene, protein, and splice products
- Figure 5. Expression of Flag-tagged versions of L5, TFIIIA, and L7 proteins
- Figure 6. GST-AtL5 fusion protein binds to 5S rRNA *in vitro*
- Figure 7. In-line probing of *Arabidopsis thaliana* P5SM RNA mutants M1 through M7
- Figure 8. The interaction of 5S rRNA with ribosomal proteins L18 (L5 homolog) and L30 (L7 homolog) in the *Haloarcula marismortui* large ribosomal subunit
- Figure 9. The relative protein expression of P5SM mutant reporters reflects their splicing patterns
- Figure 10. Replacement of the purine-rich loop sequence in L2 causes constitutive exon skipping without loss of L5 binding
- Figure 11. The two TFIIIA genes in *O. sativa*, *Zea mays*, and *Triticum aestivum* may be differentially regulated by a single or tandem arrangement of the P5SM element

##### Supplementary Table 1. Sequences of DNA primers

##### Supplementary Methods

Cloning of DNA constructs

Additional notes on non-denaturing gel shift assays

##### References



| Structure          | Sequence                                                    | ORGANISM CODE | LEGEND:                                             |
|--------------------|-------------------------------------------------------------|---------------|-----------------------------------------------------|
| Ath_AT1G72050      | GGGA.GA.CC.UCCUGA.GAAGCUCACGAA.GUAA..GCCUCG..AUCACGCAAAAUUU | Afo           | <i>Aquilegia formosa</i> x                          |
| Osa_OS02g0116000   | GGGAUGA.CC.ACCUGUGAAGCUCACACAGAAU..GCCUCG..CUCACGCUUUUCAG   | Ath           | <i>Arabidopsis pubescens</i>                        |
| Osa_OS05g0121400_1 | GGGGAGACCC.UUCUGGGAAGCUCUUAAGAAU..GCCUCU..UUCACGCUUUUCUC    | Bo1           | <b><i>Arabidopsis thaliana</i></b>                  |
| Osa_OS05g0121400_2 | GGGGAGACCC.UUCUGA.GAAGCUCACAAAGAAU..GCCUCG..UUCACACUUUUUC   | Bna           | <i>Brassica oleracea</i>                            |
| Gma_TC210774       | GGGU.GA.CC.UCCUGUGAAGCUCACAAAGAAU..GCCUCG..GUCACGUCUGUUA    | Cin           | <i>Brassica napus</i>                               |
| Pvu_62708293       | GGGA.GA.CC.UCCUGUGAAGCUCACAAAGAAU..GCCUCA..GUCACGCUUUUGAA   | Cin           | <i>Cichorium intybus</i>                            |
| Mtr_512333148      | GGGA.GA.CC.UCCUGUGAAGCUCACAAAGAAU..GCCUCG..GUCACGCUCAAUCA   | Cma           | <i>Centaurea maculosa</i>                           |
| Cme_157733196      | GGGA.GA.CC.ACCUGUGAAGCUCACAAAGAAU..GCCUCG..GUCACGCUACAGUAG  | Cme           | <i>Cucumis melo</i>                                 |
| Ptre_24019728      | GGGA.GA.CC.UCCUGUGAAGCUCACAAAGAAU..GCCUCG..AUCACGCAACUUGU   | Ees           | <i>Carthamus tinctorius</i>                         |
| Ptri_XIX2010       | GGGA.GA.CC.UCCUGUGAAGCUCACAAAGAAU..GCCUCG..AUCACGCAACUUGU   | Cti           | <i>Euphorbia escula</i>                             |
| Zel_41121587       | GGGU.GA.CC.UCCUGUGAAGCUCACAAAGAAU..GCCUCA..AUCACGCUUCGAA    | Far           | <i>Festuca arundinacea</i>                          |
| Har_113175568      | GGGG.GA.CC.UCCUGUGAAGCUCACAAAGAAU..GCCUCA..AUCACGCUUCGAA    | Gma           | <i>Glycine max</i>                                  |
| Cti_125383625      | GGGC.GA.CC.UCCUGUGAAGCUCACAAAGAAU..GCCUCA..AUCACGCUUCGAA    | Har           | <i>Helianthus argophyllus</i>                       |
| Bo1_95862514       | GGGA.GA.CC.UCCUGUGAAGCUCACAAAGAAU..GCCUCG..AUCACGCUUCGAA    | Hvu           | <i>Hordeum vulgare</i>                              |
| Bna_151196976      | GGGA.GA.CC.UCCUGUGAAGCUCACAAAGAAU..GCCUCG..AUCACGCUUCGAA    | Les           | <i>Lycopersicon esculentum</i>                      |
| Lse_22441062       | GGGC.GA.CC.UCCUGUGAAGCUCACAAAGAAU..GCCUCA..AUCACGCAACAAUA   | Lse           | <i>Lactuca serriola</i>                             |
| Cin_124593064      | GGGC.GA.CC.UCCUGUGAAGCUCACAAAGAAU..GCCUCA..AUCACGCUUCGAA    | Ltu           | <i>Liriodendron tulipifera</i>                      |
| Cma_124621642      | GGGC.GA.CC.UCCUGUGAAGCUCACAAAGAAU..GCCUCA..AUCACGCUUCGAA    | Mcr           | <i>Mesembryanthemum crystallinum</i>                |
| Ltu_74069811       | GGGG.GA.CC.UCCUGUGAAGCUCACAAAGAAU..GCCUCA..AUCACGCUUCGAA    | Mdo           | <i>Malus domestica</i>                              |
| Sca_89509507_2     | GGGA.GA.CC.UCCUGUGAAGCUCACAAAGAAU..GCCUCA..AUCACGCUUCGAA    | Mtr           | <i>Medicago truncatula</i>                          |
| Les_115279796      | GGGG.GA.CC.UCCUGUGAAGCUCACAAAGAAU..GCCUCA..AUCACGCUUCGAA    | Nbe           | <i>Nicotiana benthamiana</i>                        |
| Stu_21915114       | GGGG.GA.CC.UCCUGUGAAGCUCACAAAGAAU..GCCUCA..AUCACGCUUCGAA    | Nta           | <i>Nicotiana tabacum</i>                            |
| Nbe_EU679344       | GGGG.GA.CC.UCCUGUGAAGCUCACAAAGAAU..GCCUCA..AUCACGCUUCGAA    | Osa           | <b><i>Oryza sativa</i></b>                          |
| Nta_76870685       | GGGG.GA.CC.UCCUGUGAAGCUCACAAAGAAU..GCCUCA..AUCACGCUUCGAA    | Ppa           | <b><i>Physcomitrella patens</i></b>                 |
| Mcr_26566382       | GGGG.GA.CC.UCCUGUGAAGCUCACAAAGAAU..GCCUCU..GACACGCAAAUUU    | Ptre          | <i>Populus tremula</i> x <i>Populus tremuloides</i> |
| Hvu_16287096       | GGGAUGA.CC.UCCUGUGAAGCUCACAAAGAAU..GCCUCU..UUCACGCUUAUGAA   | Ptri          | <b><i>Populus trichocarpa</i></b>                   |
| Afo_74530416       | GGGG.GA.CC.UCCUGUGAAGCUCACAAAGAAU..GCCUCA..CUCACGCAAAUAUC   | Pvu           | <i>Phaseolus vulgaris</i>                           |
| Sca_89509507_1     | GGGA.GA.CC.UCCUGUGAAGCUCACAAAGAAU..GCCUCA..CUCACGCUUAUGAA   | Sca           | <i>Senecio cambrensis</i>                           |
| Ees_76852324       | GGGA.GA.CC.UCCUGUGAAGCUCACAAAGAAU..GCCUCA..CUCACGCUUAUGAA   | Stu           | <i>Solanum tuberosum</i>                            |
| Zma_157151872      | GGGAUGA.CC.UCCUGUGAAGCUCACAAAGAAU..GCCUCA..GUCACGCUACUGAG   | Tae           | <i>Triticum aestivum</i>                            |
| Zma_126352889_1    | GGGGAGACCC.UCCUGUGAAGCUCACAAAGAAU..GCCUCU..UUCACGCUUAUCUC   | Zel           | <i>Zinnia elegans</i>                               |
| Zma_126352889_2    | GGGA.GA.CC.AUCCUGUGAAGCUCACAAAGAAU..GCCUCU..UUCACGCUUAUCUC  | Zma           | <i>Zea mays</i>                                     |
| Far_74444787       | GGGGAGACCC.UCCUGUGAAGCUCACAAAGAAU..GCCUCU..GUCACGCUUAUCUC   | Vv1           | <b><i>Vitis vinifera</i></b>                        |
| Tae_20437489       | GGGAUGA.CC.UCCUGUGAAGCUCACAAAGAAU..GCCUCU..UUCACGCUUAUCUC   |               |                                                     |
| Tae_141663088_2    | GGGGAGACCC.UCCUGUGAAGCUCACAAAGAAU..GCCUCA..UUCACGCGUUCUC    |               |                                                     |
| Tae_141663088_1    | GGGGAGACCC.UCCUGUGAAGCUCACAAAGAAU..GCCUCU..UUCACGCGUUCUC    |               |                                                     |
| Mdo_91022954       | GGGA.GA.CC.UCCUGUGAAGCUCACAAAGAAU..GCCUCA..GUCACGCUUAUCUC   |               |                                                     |
| Vv1_ML8X_scaff_29  | GGGG.GA.CC.UCCUGUGAAGCUCACAAAGAAU..GCCUCA..AUCACGCUUAUCUC   |               |                                                     |
| Ppa_scaff_39       | GGUUCGACC.CUCUUGGAACUUCGGG.....UUCGCUUUUUUUUUU              |               |                                                     |

Sequence alignment of plant 5S rRNA mimic representatives from various plant species shows the conservation of sequence and structure. Nucleotides forming pairing interactions P1 through P3 are highlighted in color. Each sequence is annotated with the organism code (see Legend) and the corresponding NCBI accession number (for ESTs / cDNAs) or gene locus id (for sequenced genomes). The *Physcomitrella patens* (moss) sequence is displayed on a separate line because it is significantly diverged from the other sequence examples, which are from angiosperms. All sequences except for *P. patens* were used to calculate conservation of nucleotide identity and presence, and covariation or compatible mutations in base-pairing interactions (Fig. 1a), as described<sup>1</sup>.

We acknowledge the following sources for genomic data: TAIR for *Arabidopsis thaliana*<sup>2</sup>, RAP-DB for *Oryza sativa*<sup>3</sup> DoE Joint Genome Institute (JGI) and Poplar Genomic Consortium for *Populus trichocarpa*, Genoscope for *Vitis vinifera*<sup>4</sup>, and Cosmoss for *Physcomitrella patens*<sup>5</sup>.

## Supplementary Figure 2. Variant P5SM representative in the moss *Physcomitrella patens*

CLUSTAL 2.0.3 multiple sequence alignment<sup>6</sup>

```
Lhe_5S      GGAUGCGGUCAUA-CCAA-GGCUACUACACAGAUCCCAUCAGAACUCUGCAGUUAAGC-GCCUUUUGGGCCGGAAUAGUACUGGGAUGGGUG--ACCUCGCCGGGAAG
Mpo_5S      GGAUGCGGUCAUA-CCAG-GGCUACUACACAGAUCCCAUCAGAACUCUGCAGUUAAGC-GCC-CUUGGGCCGGAAUAGUACUGGGAUGGGUG--ACCUCGCCGGGAAG
Apu_5S      -GGUGCGGUCAUA-CCAG-GGCUACUACACAGAUCCCAUCAGAACUCUGCAGUUAAGC-GCC-CUUGGGCCGGAAUAGUACUGGGAUGGGUG--ACCUCGCCGGGAAG
Plag_5S     GGAUGCGGUCAUA-CCAA-GGCUACUACACAGAUCCCAUCAGAACUCUGCAGUUAAGC-GCC-UUUGGGCCGGAAUAGUACUGGGAUGGGUG--ACCUCGCCGGGAAG
Ppa_P5SM   CUAUGCAGCGAAAUCCAAAGGC--CU--ACCAGAUCCCAUCAGAACUCUGCAGUUAAGC--UUU-GGCCGGAUUAGUUC-GGGA-GGUUCGCACCCUCUUUGGAAC
*** * * * *
*** * * * *
*** * * * *
*** * * * *
*** * * * *
*** * * * *
```

```
Lhe_5S      UCCCGGUGUGCAUCCA
Mpo_5S      UCCCGGUGUGCAUCCA
Apu_5S      UCCCGGUGUGCACCCU
Plag_5S     UCCCGGUGUGCAUCCA
Ppa_P5SM   UUCCGGUGUGCUUUUAU
* ****
* ****
* ****
* ****
* ****
* ****
```

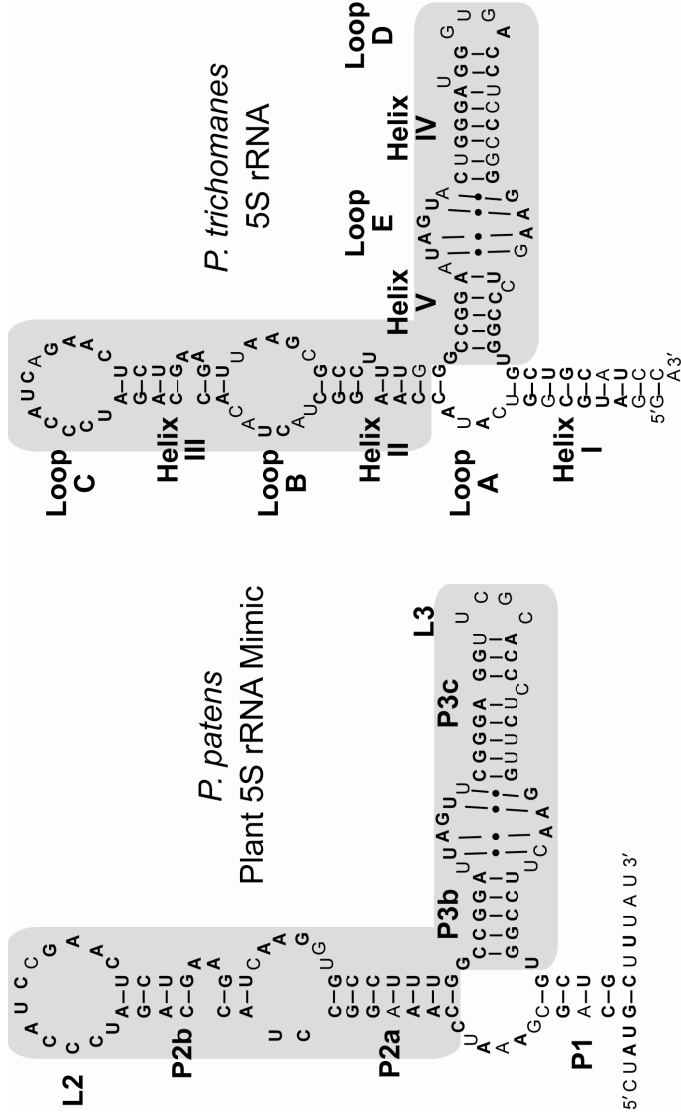

Through tBLASTn searches of the *Physcomitrella patens* genome using the amino acid sequence for zinc fingers 2 and 3 of AtTFIIIA, we identified a variant of P5SM in a putative TFIIIA gene of the moss *P. patens*. Since the 5S rRNA sequence for this organism is not yet available, we aligned the *P. patens* P5SM sequence to the 5S rRNA sequences for four Bryophyta species: *Marchantia polymorpha* (Mpo, liverwort), *Lophocolea heterophylla* (Lhe, liverwort), *Plagiomnium trichomanes* (Plag, moss), and *Anthoceros punctatus* (Apu, hornwort)<sup>7</sup>. Asterisks indicate conserved nucleotides across the five sequences. The secondary structure model for the *P. patens* P5SM was manually determined based upon comparisons to *P. trichomanes* 5S rRNA (shown) and *A. thaliana* P5SM (Fig. 1c). Nucleotides in bold are identical between moss 5S rRNA and P5SM, and were used to calculate the percentage of the 5S rRNA sequence maintained in the P5SM sequence.



Supplementary Figure 3. In-line probing analysis of *Oryza sativa* P5SM RNAs

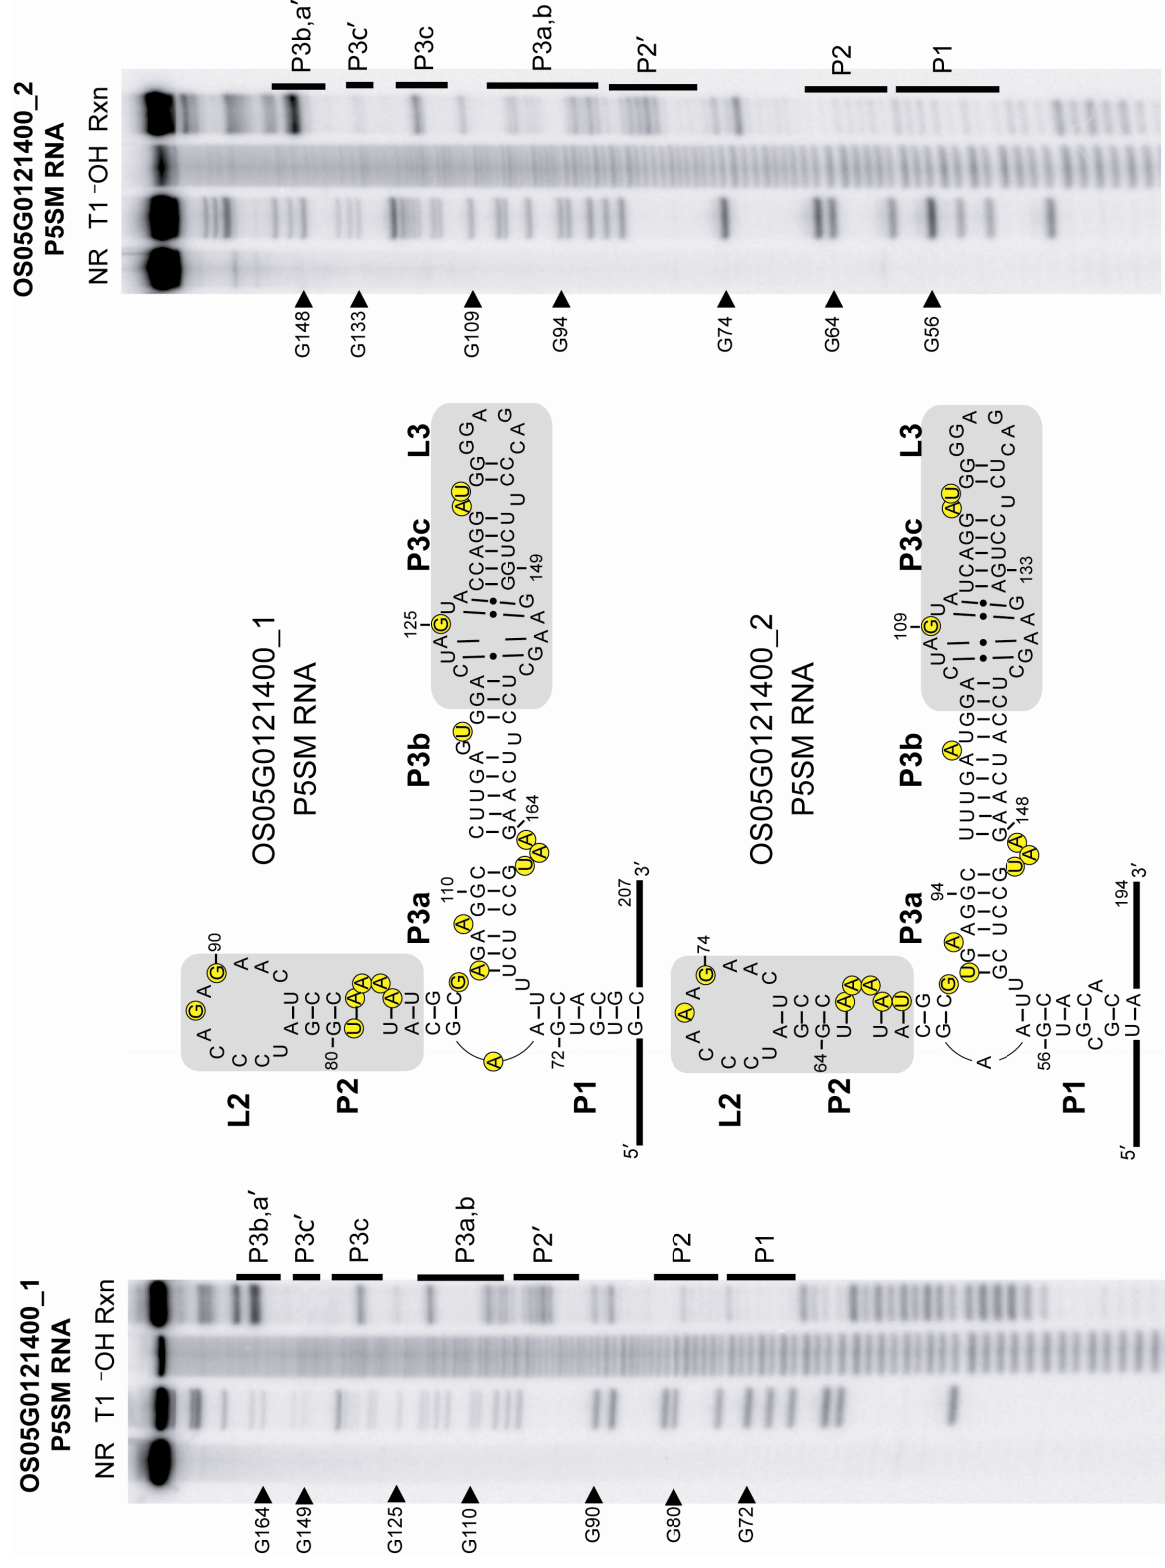

The structure of two *O. sativa* representatives of P5SM were analyzed by in-line probing ("1" consists of nucleotides 903-1109 and "2" consists of 1500-1693 of OS05G0121400 gene, NCBI gi 115465852). Nucleotides spontaneously cleaved under in-line reaction conditions are circled in the secondary structure models of the rice P5SM elements. Labeled G nucleotides correspond to the same positions labeled in the *A.thaliana* representative of P5SM (Fig. 1b).

## Supplementary Figure 4. Sequences of TFIIIA gene, protein, and splice products

LEGEND: Primer annealing site, UTR, coding sequence, cassette sequence, stop codon, splice site, zinc finger, cassette protein sequence, ! = translation termination, XhoI

AT1G72050: NCBI gi 42592260 / NC\_003070 region 27118686..27121132

| <u>Precursor mRNA sequence</u> |            |             |            |            | <u>Protein sequence</u> |                     |
|--------------------------------|------------|-------------|------------|------------|-------------------------|---------------------|
| 1                              | GUGCGGCGUC | UGAUGGAGG   | AGAUAAACCC | UAGUUCUUCU | GUAGACAAUA              |                     |
| 51                             | AGAGAGACAU | GCGGGAAGAA  | GCUAAAGUUG | AUGUGAAGAC | UUCGGCGAAG              | MAEEAKVDVKTSAK      |
| 101                            | AAGGAUAUAC | GCAAUUAUCU  | AUGCCAGUAU | UGCGGAAUCA | GCAGAUCAA               | KDIRNYLCQYCGISRSK   |
| 151                            | AAACUAUCUC | AUCACUAAAC  | ACAUCCAAUC | UCAUCAUCAG | GUUUGAGAUC              | NYLITKHIQSHHQ       |
| 201                            | UCCUCAAU   | UCGAUCCAA   | UUUCUCAUC  | GUGGCAUCU  | GAUUUGUUU               |                     |
| 251                            | CAAUGAAAU  | GAGAGUUGAG  | UCUGUAGAAU | CGGCGAUGGU | UUGUUGAAU               |                     |
| 301                            | GAGAGUUUCU | AUGAUUCGUU  | UGUUUAGAUG | GAACUUGAAG | AGGAAAGAGA              | MELEEERD            |
| 351                            | UGAUGAAGCU | UGUGAGGUUG  | AUGAGGAGUC | UUCAAGUAAU | CAUACUUGUC              | DEACEVDEESSNHTCQ    |
| 401                            | AAGAUGUGG  | UCGAGUUUU   | AAGAAACCCG | CUCACUUGAA | GCAGCAUAUG              | ECGAEFFKPAHLKQHMQ   |
| 451                            | CAGAGUCAUU | CGCUCGAGGU  | AGAUUUAUGC | AUCCUCUUGU | CAUGAGAAGU              | SHSLE               |
| 501                            | CGAAUUGUUC | CCAUUCUGUG  | UGUUGCAGCU | ACAGAUGGAG | AUACAUAGAG              |                     |
| 551                            | AUACUCGUGG | AUUUUGCUUA  | GUGUUGAGUU | UUGUUCUGGU | UGUGAACUA               |                     |
| 601                            | AAGUUUAUAC | AUUUGCAGGA  | AAUAAUAGC  | CUUUUGUUUA | AAUCAAAAGG              | EINSLLFKSK          |
| 651                            | UCUUACCUAU | GUUAUUGCGU  | GAGGCAUUGG | AUCCCAAAGA | GAGAUCUCCA              | GLTYVIA!            |
| 701                            | AAAUGCGAGG | CUACAUGUUA  | UGGACUAGUA | UCAGGUUGGG | AGACCUCCUG              |                     |
| 751                            | AGAAGCUCCA | GCAAGUAAGC  | CUCGAUCACG | CAAAUUGUUU | GAGGUCUGAU              |                     |
| 801                            | GUUCAAUAGC | UUGUUUUGUU  | UCACUUUGCU | UUGGACUUUC | UUUUCGCCAA              |                     |
| 851                            | UGAGCUAUGU | UUCUGAUGGU  | UUUCACUCUU | UUGGUGUGUA | GAGAUCUUUU              | RSF                 |
| 901                            | ACUUGCUAUG | UGGAUGAUUG  | UGCUGCUAGC | UAUAGGAGGA | AGGAUCAUCU              | TCYVDDCAASYRRKDHL   |
| 951                            | CAAUAGGCAU | CUUCUACAC   | AUAAAGGGAA | GCUCUUUAAG | UGUCCGAAGG              | NRHLLTHKGLFKCPKE    |
| 1001                           | AGAACUGCAA | GAGUGAAUUC  | UCAGUACAGG | GAAUUGUUGG | UAGGCAUGUU              | NCKSEFSVQGNVGRHVK   |
| 1051                           | AAGAAUAUAC | AUAGUAUAUA  | CAACCGUGAU | AAGGACAAUA | CUGGUUUGGG              | KYH\$SNDNRDKDNTGLGD |
| 1101                           | CGAUGGUGAU | AAGGACAAUA  | CUUGUAAGGG | GGAUGAUGAU | AAGGAAAAAU              | GDKDNTCKGDDKEKSG    |
| 1151                           | CUGGUAGUGG | CGGUUGUGAG  | AAGGAAAAUG | AAGGGAAUGG | CGGAAGUGGU              | SGGCEKENEGNGSGKD    |
| 1201                           | AAGGACAAUA | AUGGUAUUGG  | CGAUUCUCAG | CCUGCGGAGU | GUUCAACUGG              | NNGNGDSQPAECSTGQK   |
| 1251                           | UCAGAAGCAG | GUUGUCUGCA  | AAGAAUUGG  | UUGUGGAAA  | GCCUUUAAGU              | QVVCKEIGCGKAFKYPS   |
| 1301                           | AUCCUUCACA | GCUUCAAAAG  | CAUCAGGAUU | CUCAUGGUA  | GUGCACCUUC              | QLQKHQDSH           |
| 1351                           | CUACCCUUAC | UUUCCUCUA   | GUUUAGUAUC | CUGGGCAUAU | GAAGAUUUUC              |                     |
| 1401                           | ACGUUCCUC  | UCUAGUGCU   | UUGUUUAAA  | UUAAGACAG  | UUGUUUGUUA              |                     |
| 1451                           | AAGCUUGAUA | GAUUUCAAU   | CUCUGAAGGU | UUAGAUAUAC | AUUUGCAGUG              | V                   |
| 1501                           | AAAUUAGACU | CUGUGGAGGC  | AUUUUGUUC  | GAGCCUGGGU | GUAUGAAGUA              | KLDSVEAFCSEPGCMKY   |
| 1551                           | CUUUACCAAC | GAAGAAUGCC  | UCAAGUCACA | CAUAAGAUC  | UGUCAUCAGC              | FTNEECLKSHIRSCHQH   |
| 1601                           | ACAUCAACUG | UGAGAUUAGU  | GGUUCUAAAG | AUUUGAAAA  | GAACAUCAAG              | INCEICGSKHLKKNIKR   |
| 1651                           | AGACAUCUAC | GGACUCAUGA  | UGAAGAUUCC | UCACCAGGAG | AAAUCAAGUG              | HLRTHDEDSSPGEIKCE   |
| 1701                           | UGAAGUUGAG | GGUUGUCUUG  | CGACUUUCUC | CAAGGUAAG  | AAACAUCUG               | VEGCSSTFSK          |
| 1751                           | AGCUACGUC  | AACUUUAUA   | GUCCAAAACA | AGUUUCGUUU | CCAGAUUAUU              |                     |
| 1801                           | CAACAUCACU | AAUUACAUA   | CGAUUAUUUC | UCAGGCUUCU | AAUCUUCAGA              | ASNLQ               |
| 1851                           | AACACAUGAA | AGCAGUGCAC  | GAUGAUUAC  | GUCCUUUGU  | CUGUGGCUUU              | KHMKAVHDDIRPFVCGF   |
| 1901                           | CCCGGUUGUG | GCAUGAGAUU  | UGCUIACAAA | CAUGUCAGAA | ACAAGCACGA              | PGCGMRFAVKHVRNKHE   |
| 1951                           | GAAUCCGGG  | UAUCACGUAU  | AUACCGGCU  | AAGUUAUCC  | AACCUACAUA              | NSGYHVYTC           |
| 2001                           | CUAUCGUGUU | UUUCUUACAA  | ACUCAAAAGA | CUAGAUAUC  | AUGUAAAACU              |                     |
| 2051                           | GAAUGUGUU  | UCAGGGUGAU  | UUUGUCGAAA | CUGAUGAAG  | UUUCACUUA               | GDFVETDEDFTS        |
| 2101                           | AGACCGAGAG | GUGGACUAAA  | GAGGAAACAA | GUUACUGCGG | AAUUGCUGGU              | RPRGGLKRKQVTAEMLV   |
| 2151                           | ACGAAAGAGA | GUCAUGCCUC  | CUCGGUUUGA | UGCAGAAGAA | CACGAAACUU              | RKRVMPPRFDA EEHET   |
| 2201                           | GCUAGUAGUG | UCCAAGCCUU  | AAUUUAUUUU | UCUGUCUUA  | GAUAAGUGAA              | C!                  |
| 2251                           | GUAGUUUUGU | GUAAAAGUUCU | UUUUGUUUGU | GUGUUGGUAG | GAAGAAUAU               |                     |
| 2301                           | AGAACUACAA | UAGUAGGUAG  | UAAUUAAGU  | AAUGUUGUUC | UUAGAAUCUA              |                     |
| 2351                           | UGUUCGUUUA | ACCUUUUAUC  | UCCCACGGCU | UUAUGUAUU  | GAACCCAACG              |                     |
| 2401                           | UUUGAGAUAU | AAGUAAUGUU  | GUGCUUAUA  | UCUAUGUUCG | UUUAACC                 |                     |

RT-PCR products (from primers a and b) were cloned into TOPO vector and clones were sequenced. Primer sites are underlined. Overhang and restriction sites in primers are in lowercase.

Primer a: 5'-atgcgatccGTGCGGCTCTTGATGGA

Primer b: 5'-ACTCTTGCAGTTCTCCTTCG

#### AT1G72050 PRECURSOR

```
1  GUGCGGCGUC  UUGAUGGAGG  AGAUAACC  UAGUUCUUCU  GUAGACAAUA
51  AGAGAGACAU  GCGGAAGAA  GCUAAGUUG  AUGUGAAGAC  UUCGGCGAAG
101 AAGGAUAUAC  GCAAUAUCU  AUGCCAGUUA  UGCGGAAUCA  GCAGAUCAA
151 AAACUAUCUC  AUCACUAAAC  ACAUCCAAUC  UCAUCAUCAG  GUUUGAGAUC
201 UCCUCCAAU  UCGAUCCAA  UUUCUCAUC  GUGGCAUCUU  GAUUUGUUUU
251 CAAUGAAAU  GAGAGUUGAG  UCUGUAGAA  CGGCGAUGGU  UUGUUGAAUU
301 GAGAGUUUCU  AUGAUUCGUU  UGUUUAGAU  GAACUUGAAG  AGGAAAGAGA
351 UGAUGAAGCU  UGUGAGGUUG  AUGAGGAGUC  UUCAAGUAAU  CAUACUUGUC
401 AAGAAUGUGG  UGCUGAGUUU  AAGAAACCUG  CUCACUUGAA  GCAGCAUAUG
451 CAGAGUCAUU  CGCUCGAGGU  AGAUUUUAGC  AUCCUCUUGU  CAUGAGAAGU
501 CGAAUUGUUC  CCAUUCUGUG  UGUUGCAGCU  ACAGAUGGAG  AUACAUAGAG
551 AUACUCGUG  AUUUUGCUUA  GUGUUGAGUU  UUGUUCUGGU  UGUGAACUAA
601 AAGUUUAUAC  AUUUGCAGGA  AAUAAUAGC  CUUUUGUUUA  AAUCAAAGG
651 UCUUACCUAU  GUUAUUGCGU  GAGGCAUUG  AUCCCAAAGA  GAGAUCUCA
701 AAAUGCGAGG  CUACAUGUUA  UGGACUAGUA  UCAGGUUGGG  AGACCUCUG
751 AAGAGCUCCA  GCAAGUAGC  CUCGAUCACG  CAAAUGUUU  GAGGUCUGAU
801 GUUCAAUAGC  UUGUUUUGUU  UCACUUUGCU  UUGGACUUUC  UUUUCGCCAA
851 UGAGCUAUG  UUCUGAUGGU  UUUCACUCUU  UUGGUGUGUA  CAGAUCUUUU
901 ACUUGCUAUG  UGGAUGAUUG  UGCUGCUAGC  UAUAGGAGGA  AGGAUCAUCU
951 CAAUAGGCAU  CUUCUACAC  AUAAAGGGAA  GCUCUUUAA  UGUCCGAAGG
1001 AGAACUGCAA  GAGU
```

#### AT1G72050 SPLICE PRODUCT I

```
1  GUGCGGCGUC  UUGAUGGAGG  AGAUAACC  UAGUUCUUCU  GUAGACAAUA
51  AGAGAGACAU  GCGGAAGAA  GCUAAGUUG  AUGUGAAGAC  UUCGGCGAAG
101 AAGGAUAUAC  GCAAUAUCU  AUGCCAGUUA  UGCGGAAUCA  GCAGAUCAA
151 AAACUAUCUC  AUCACUAAAC  ACAUCCAAUC  UCAUCAUCAG  AUGGAACUUG
201 AAGAGGAAAG  AGAUGAUGAA  GCUUGUGAGG  UUGAUGAGGA  GUCUUAAGU
251 AAUCAUACUU  GUCAAGAAUG  UGGUGCUGAG  UUAAGAAAC  CUGCUCACUU
301 GAAGCAGCAU  AUGCAGAGUC  AUUCGCUCGA  GAGAUCUUUU  ACUUGCUAUG
351 UGGAUGAUUG  UGCUGCUAGC  UAUAGGAGGA  AGGAUCAUCU  CAAUAGGCAU
401 CUUCUACAC  AUAAAGGGAA  GCUCUUUAA  UGUCCGAAGG  AGAACUGCAA
451  GAGU
```

#### AT1G72050 SPLICE PRODUCT II

```
1  GUGCGGCGUC  UUGAUGGAGG  AGAUAACC  UAGUUCUUCU  GUAGACAAUA
51  AGAGAGACAU  GCGGAAGAA  GCUAAGUUG  AUGUGAAGAC  UUCGGCGAAG
101 AAGGAUAUAC  GCAAUAUCU  AUGCCAGUUA  UGCGGAAUCA  GCAGAUCAA
151 AAACUAUCUC  AUCACUAAAC  ACAUCCAAUC  UCAUCAUCAG  AUGGAACUUG
201 AAGAGGAAAG  AGAUGAUGAA  GCUUGUGAGG  UUGAUGAGGA  GUCUUAAGU
251 AAUCAUACUU  GUCAAGAAUG  UGGUGCUGAG  UUAAGAAAC  CUGCUCACUU
301 GAAGCAGCAU  AUGCAGAGUC  AUUCGCUCGA  GAAAUAAAU  AGCCUUUUGU
351 UUAUUAUCAA  AGGUCUUACC  UAUGUUAUUG  CGUGAGGCAU  UGGAUCCCAA
401 AGAGAGAACU  CCAAAUUGCG  AGGCUACAUG  UUAUGGACUA  GUAUCAGGUU
451 GGGAGACCUC  CUGAGAAGCU  CCAGCAAGUA  AGCCUCGAUC  ACGCAAAUUG
501 UUUAGAUCUU  UUACUUGCUA  UGUGGAUGAU  UGUGCUGCUA  GCUAUGAGG
551 GAAGGAUCAU  CUCAAUAGGC  AUCUUCUAC  ACAUAAAGGG  AAGCUCUUUA
601 AGUGUCCGAA  GGAGAUCUC  AAGAGU
```

OS02G0116000

Precursor mRNA sequence

Protein sequence

1 AGUCCUCACU CCCCGCCGCC GCCGCCGCC CUCCAUCCUC CUCACGGAGA  
51 AGCGCGGGAA AUCACACCUC GUCGCAGCCA AGAUCUCCUC CAGUCCAAAC  
101 GCAUCAAAAG UUCCAAGGU GGC AUCCAAU CCUCGCUUGC AAACACAACC  
151 ACCAUGCCCA AAACCGAUGC CUACUUGGA GUUAGGAAUA UGUUUUCUUG  
201 AUUUGGUUUA CGCGUUGGUA AUUCUUCGCU UUCGAUUUGA GCAGUUAAAA  
251 GCAUGAGAU GUAAUAACCA AAUCGAUCCU GAUCUGUGCG UUUAGAUUCU  
301 GGGCUUGUGG UCAGUGUUCG UUGAAACAGC ACGAAAUUGU UAAUAGUCUA  
351 AGCAGUGUGG AUGUCGUUUG AGUUAUUGU AGCUUUUUU CCUAGUAAU  
401 UUAGCUCAA UUCCAGUUG UGCUGUUCGG GAGAGCUUCU UGCGUUGAGG  
451 AGAGGGGGGA UGAAUAGAA CGUUUGCCAC CACCUUCUCA CCCAGUGCAA  
501 AACCAUAAGA GAGCUCCAAA GAAUCCACGC CCAGGCCUC ACACACGGCC  
550 UCCACCCCAA CCAGCAGUCC AUCUCCUGCA AAAUCUUCG GUCCUAGCC  
601 GAGUUUGGCC GACCGGCGA CGCAGGAGG UUGUUUGAUG AAUCCCCCA  
651 CCCUGACAUU AUCUCCUUA CCAGCCUCAU GUCCUUCUUA CUCAGUUUG  
701 AUCACCACUG GAAAGCUAUA UCCGUGUUCU CUCACGCCAU UGCUUCUGGC  
751 CACCGCCUG AUGGCUUUGC UGCUGUCGGU GCCUCUCGG CCUCUGGUG  
801 AUUAGGGGAU CAGCGUAUUG GUAGCGUGGU GCAUGGCCUG AUUUUUCGGU  
851 GUGGAUUGGA CUCUGAGUUG GUCGUUUGUA AUGCUUUGGU UGAUAUGUAU  
901 UGUCGAUGUG GCAAGUUUGA GCCUGCACGG ACUGUAUUUG AUAGAAUGCU  
951 UGUAAAAGAU GAGGUCACUU GGGGUAAGCA GCUGUAUGGU UACAUGAAGU  
1001 GUGUUGGUGU GGAUUCAGCU UUGUCAUUCU UUAUCAGAU GCCUAUGAAG  
1051 AGCACUGUUU CUUGGACAGC ACUGAUCACU GGUCAUGUUC AAGACAAGCA  
1101 GCCUAUCCAA GCUCUUGAGC UAUUUGGUA GAUGC UUUUG GAGGGCCACC  
1151 GUCCUAACCA UAUUACAAU GUAGGGGUGC UAUCAGCUUG UGCUGAUUU  
1201 GGUGCUUUGG AUCUUGGACG UGCCAUUCAU GGAUAUGGAA GCAAUCUUA  
1251 UGCCACCACC AAUAUAUUG UUACAAUUGC UCUGAUGGAU AUGUAUGCAA  
1301 AGAGUGGAAG CAUUGCUAGU GCAUUUUCUG UAUUUGAAGA AGUUCAGAUG  
1351 AAGGACGCAU UCACAUGGAC AACUAUGAUU UCAAGUUUA CUGUCCAGGG  
1401 UAAUGGGAG AAAGCUGUUG AGCUCUUUUG GGAUAUGCUA AGGUCUGGGA  
1451 UACUCCAAA CAGUGUGACA UUCGUCUCAG UUUUGUCAGC AUGCAGCCAU  
1501 GCUGGGUUA UACAAGAAG CAGAGAGUUA UUUGAUAAAA UGCGUGAAGU  
1551 CUACCAUAU GAUCCCGGC UUGAGCACUA UGGAUGCAUG GUUGAUCUGU  
1601 UAGGACGGGG UGGACUUCUA GAAGAAGCAG AAGCUCUGAU AGAUCAUUUG  
1651 GAUGUCGAGC CUGAUUUUGU UAUUUGGAGG UCACUUCUUA GUGCAUGCCU  
1701 AGCUC AUGG AAUGAUGAU UAGCUGAGAU UGCUGGAAUG GAAAUUAUA  
1751 AGAGAGAACC UGGGAUGAU GGGGUUUUG UGCUUCUUUG GAACAUGUAU  
1801 GCCUUAUCA ACAGAUGGAA AGAAGCUUUG GAUAUGAGGA AGCAGAUGUU  
1851 GAGUAGGAAA AUUAUAAAA AACCGGGUUG CAGUUGGAU GAAGUUGAUG  
1901 GUGUCGUCCA UGAAUUUUUG GUAGAGGACA AGACACAUGA UGCUAGAAGG  
1951 GAAAUUUUG UCACCUUGGA AAUCAUGGCU AGGCAUCUCA AGAUGGAUCC  
2001 CAUACCAUCU CCAUUAGUGU UAACUGAUGG AGAACACAUG CUCUAGAAAC  
2051 ACAUAUUGUC CUUUUUUUU CUUCCUUUG AUGACCUCUA ACCGAACUGA  
2101 GGAUGAUUG CUGAUUUUUU UUUUUUUUG UUAGUGACAA GGCACCAUAG  
2151 UUUUGUUUG AUUUGUUUGA UUAACCAAU AGUGAUAGCC AGUUGUAACA  
2201 CACUGAUGUU AUUUAUUGA AAAUGCAGAA UUGUAGAGAU UUAUUUAGA  
2251 UGUCGACCG CAGAUUUGCU AUACCUGAU UUGUUUGGU CACUCUGUA  
2301 AAAAAAGAGU AAAGACUGCA AUGCGUCCA GUUCAUGUUA UGGACUUCUC  
2351 CUCAUUUUAC AGCUAUCUUG CUGACUACA CGCUACCUCU GAAUGUUUA  
2401 CUUGUUUAC UUUUUUAUA UAUAUUGAC UUAUUUAUGU GUGCCGAAU  
2451 UCUAACUAUC UGAUUUGCCU ACUAUUGAU GUGCUCUGGA GAUGAUUUG  
2501 AUGGAGACAU GAGGGUUGAA GCAACACAAC ACAGGGAUUA AAGGCGUAC  
2551 AAGUGUGAAU UUUGCACGGU UGUUAGGUCC AAAAAUUGUC UCAUCCGAGC  
2601 UCACAUGGUU GCUCAUCAU AGGUUAUAAA CUACUUGAU AUUUUAGGAA  
2651 UAUGGGCCAU AUUAUGCCU AUGUUUUAAA GACAAUGUGG ACUGUAUUA  
2701 UUAUUUGAG UUAUUUGACC GUUAUGGUUC UCUGAUUGA GUUUAGGUCC  
2751 AUCAAUCAU AUUUUGUGC UUUUGUCAU UCCUUCUGCU CUUAUCCAUU  
2801 UGAAUCAUA UAUGAAUAUC UGAUGCCUC ACUUCAAAU UAUCUAUAGG  
2851 AAGAUCUGGA CAAUCCGAA AUCUACAAGU CAAUUGGGGA AAAGGUUGU  
2901 CAUGAAGGUG ACCACACCUG CCAAGAGUGU GGUGCUUCU UCCAGAAGCC

MCSGDDI  
DGM RVEATQHRDIRRY  
KCEFCTVVRSKKLIRA  
HMVAHHK  
  
E  
ELDKSEIYKSNGEKVVH  
EGDHTCQECGASFQKPA

2951 AGCUCAUCUG AAGCAGCAUA UGCAAAGUCA CUCUGAUGAG GUUGGCAUUU  
3001 CUCAUAUGUG CAUACAACAU GAUAUUGCUU UUUUGUUGGA AUGGUGCUGG  
3051 GAUUAUUGUU UUUGGAAACA UUUAAAACAUA ACAUUCUUGU AUGGUUUUUC  
3101 UCCGUCCGUC GAUCUGGUUG UCAAAGAAAU UGUUCUUAUC UACUUCAAUU  
3151 UGCUAAAAAC AAGUGUUUUG CAGGAUAUAG AUUCUUAACU GUGUGAAGCA  
3201 UUGGAUCCCA AAGAACUCCA AAAUGCGAUG AGGCAUAUUU AAUCUUGUCU  
3251 GGACUAGUAA CAGGUUGGGA UGACCACCUG UGAAGCUCCA ACAGGAUUGC  
3301 CUCCUCACGC UCUUUCAGGA GGUUUGUCU UGCUUGUAUU AGUUCUUUUC  
3351 UUUUUUACUA UUUUGAUUUA UAUUCAACUU CAUGGGAUAG CCUGCAUCUC  
3401 CUUGUUUCCA AUUAAGUACU AAUGUCUCU UUGUUGUAUG CACAUGUGCU  
3451 GGAAUUCUUA GUUUAUCAA UUGCCUUGU GUAUGCUAUA CAUGUAUUCU  
3501 UUAUUUUUUA UUAGUAACAA GGUUUUUUAC AGCAUAACAUA UACAUAUUUA  
3551 GUGUUUUUUU ACAGCAUGCA UAAAUGGUGA AAACUGAUUA CUGCUUAAUU  
3601 AUUGACUAGU UGCUGGCUAU UUUACAUUUU UUUGAUUUG CAAUCUUGU  
3651 GAAUUGGAUC CAUGCAGUGA AUUUGGGAGG UUAUCUUCUC CUUUGUUCUA  
3701 AUGUUCUCUC UCACUCUCUU UGGGCUUCUG GAACCUUGGU UUGGAGGUCC  
3751 UUAGUUGGAA CAAAGAGGGG AUCCAAGAUA AAAUAACUA CUCAGAAAGC  
3801 UAGGGCCUUC UGUAAUAGGU UCAUUUAGCU CGCUAUGGUG UUGAUUUCUC  
3851 CAUCAUAUAC AAAACUACAA UAUGUUCUGU UGCAAAUUUA AUAUGAAUUG  
3901 UUUUAGCUGA UAAACACCUG UGCACAACUU UUUGCUGAUA AAUAGUACUA  
3951 CUUCUAUUUC AGGUUAUAAG AUGUUUUGAC UUUGGUCAAA GUCAAACUGC  
4001 UUUAGGUUUU ACUUAGUUUG UAGAAAAAAA UAAUAACAUA UUCAACCCAA  
4051 GACAAUUUUA UUAUGAAAAU AUUUUUUUU AUUGAUUUUA UGAAACUAAU  
4101 UUGGUUUUUA AAAUUAUACU AUUUUUGCCU AUAAAAUUUA UCAAACUUGA  
4151 AGUAGUCUGA CUUUGACUAA AGUCAAAACU UCUUAUAACC UGAAACGGAG  
4201 GGAGUAGGCA UUGAAUAGAA UAGGUUAUGG AUCCUUUGGA GAAUAAGGUU  
4251 AGCAAUAUUC CUUCAUUCAU CCUACUAUUU CUUUGGAUCU CCUUUUGGGA  
4301 GCUUUGAGAA GAGGUGAGAG GAUCCAACAU CAAAUGUCA CCUCAGAAAG  
4351 CUAGGACUUA UCAUCAUUGG UUCUCAGCUC GCUAUGGUGA UUAUACUCCC  
4401 UUUUAUCUCU AUCAUCUUA UGGAAAACU UGAACAUUUA GGUUUUCGUU  
4451 GCAUAUCCG UUAACAGUU UACUAGAUUA UUUUUUUUAG AUAAUUUAUA  
4501 AGUAUGAAAG AAAUGUGUAA GCUUACAGCA GCUUCAGUUU UGACUCGUUC  
4551 CCUUCUUGAC UGUAGAUC GUUCAUUUG CCACUUGAAG ACUGCCUUU  
4601 CAGCUACAUA AGGAAAGAUC ACUUGAACCG UCAUAUGCUU AAGCAUCAAG  
4651 GGAAGUUGUU UACCUGCUCU AUGGAUGGUU GUGGUAGGAA GUUCAGUUA  
4701 AAGGCAAUA UGCAAAGGCA UGUAAAAGAA AUCCAUGAGG AUGAAACUGC  
4751 UACUAAAAGC AACCGGCAGU UUGUUUGCAA GGAGGAGGCG UGUAAACAAG  
4801 UUUUAAAAG UGCUUCAAAG AUGAAGAAC AUGAAGAAUC ACAUGUAUC  
4851 UCCUCAGUUA CUUAUAGUAG AUCAGGCGCU GCCUUGUAAA UUUCAGAACU  
4901 AAAAAACUGC AGCUCAAUCC AUGCAUUUA UAAUUUAUA UGCUAAUGGU  
4951 AUCCCCAGAA UUAUUUAUA UUGUGCUGUU CUGGCAGUGA AAUUGGACUA  
5001 CGUGGAAGUA GUCUGCUGUG AACCAGGCGU CAUGAAGACA UUCACAAAUG  
5051 UUGAAUGUUU GAGGGCUCAU AAUCAGGCUU GCCAUCAAUA UGUUCAGUGU  
5101 GAUAUCUGUG GGGAAAAACA CCUGAAGAAG AACAUUUAAA GGCACCUACG  
5151 AGCCCAUGAG GAGGUGCCA UACUGGAAAG GAUAAAAUGC AGUUUUGAGG  
5201 GCUGUGAUG CUCUUUUUCC AAUGUUAAGUC UAUUAUCCCC AAAUGUUCUG  
5251 AUGCAUUGUU UGUUGUCUUC CUCUUGAACU GUAGCUUUG UCGUAUCUGG  
5301 UGUGGAUUGA AACUUGUUA CUGUCCUCC UAUUGCAGAA AUCAAUUUA  
5351 ACCAAACAUA UAAAGGCGUC CCAUGAUCAA GUAAAACCUU UCGCAUGUCG  
5401 AUUCACGGGG UGUGAAAAGG UGUUUCCAUA CAAGCAUGUC AGGGACAACC  
5451 AUGAGAAAUC CAGCGCUCAU GUAJACACU AGUGAGUUU UGCUAACCGA  
5501 UCUUUAGCUC UUCUGCGCG GUCUUGUGCU UGCCCCAAUC AUUUGAGUGA  
5551 CAAACUGACA AGCUUUUACC ACAUCCAGGC AAACUUCACG GAGAUGGACG  
5601 AGCAGUUACU CUCGUGUCCG AGAGGUGGAC GGAAGAGGAA AGCUGUGACU  
5651 GUCGAAACUC UUACGCGCAA GAGGGUGACC AUGCAGGCG ACGCUUCGUC  
5701 GUUGGACAAU GGAACUGAGU ACCUGCGCUG GUUGCUUUCU GGUGGGGAUG  
5751 AUGAUUCGAG CCAAACUCAU UAGCCGUUUC AUUUUUGCAU CUGAUUUGUA  
5801 UGGUCAUGGU GUCAAUGGCU CAAUGCUUUG UCGUAAAGGG GUGUGCUAGC  
5851 CCACUCACGU UGGUAGUUAG AUGGCCGUGG UGUUUUUGUU GUAAGUAGUU  
5901 GGUCUGAAUU UAGAAAGUGC AGCAGUUUUA GAGGAAGCCU ACUAGUAGUA  
5951 UAUUUUUGUA GCAUUAUGGC GCAGUUUGAG UUGUGAGUUG UAAGUUAUUU  
6001 GAUUCUUUAC UGUUUUGACC ACUGUUUCUUG GAACCUCAA AUUUUUUGAC  
6051 UUGUUGAUG CAAAAAUGA UGUGAUUACA AGUUUUGGUU CUUC

HLKQHMQSHSDE

DIDS!

RSFICPLEDCP  
FSYIRKDLNLRHMLKHQ  
GKLFTCMSDGCGRKFSI  
KANMQRHVKEIHEDETA  
TKSNRQFVCKEEGCNKV  
FKYASKMKKHEESH

VKLD  
YVEVVCCEPGMKFTFN  
VECLRHNQACHQYVQC  
DICGEKHLKKNIKRHLR  
AHEEVPSTERIKCSFEG  
CECSFSN

KSN  
LTKHIKASHDQVKPFAC  
RFTGCEKVFPYKHVRDN  
HEKSSAHVYTQ

ANFTEMD  
EQLLSFRGGRKRKAVT  
VETLTRKRVTMHGDAAS  
LDNGTEYLRWLLSGGDD  
DSSQTH!

RT-PCR products (from primers c and d) were cloned into TOPO vector and clones were sequenced.

Primer c: 5'-TGATGGAGACATGAGGGTTG

Primer d: 5'-TGTTACAGCCCTCCTCCTTG

#### OS02G0116000 SPLICE PRODUCT I

```
1  UGAUGGAGAC AUGAGGGUUG AAGCAACACA ACACAGGGAU AUAAGGCGCU
51  ACAAGUGUGA AUUUGCACGG UUGUUAGGUC CAAAAAACGU CUCAUCCGAG
101 CUCACAUGGU UGCUCAUCAU AAGGAAGAAC UGGACAAAUC GGAAAUCUAC
151 AAGUCAAAUG GGGAAAAGGU UGUUCAUGAA GGUGACCACA CCUGCCAAGA
201 GUGUGGUGCU UCUUCCAGA AGCCAGCUCA UCUGAAGCAG CAUAUGCAA
251 GUCACUCUGA UGAGAGAUCG UUCAUUUGCC CACUUGAAGA CUGCCUUUC
301 AGCUACAUAU GGAAAGAUCA CUUGAACCGU CAUAUGCUUA AGCAUCAAGG
351 GAAGUUGUUU ACCUGCUCUA UGGAUGGUUG UGGUAGGAAG UUCAGUGUAA
401 AGGCAAUAU GCAAAGGCAU GUAAAGGAAA UCCAUGAGGA UGAAACUGCU
451 ACUAAAAGCA ACCGGCAGUU UGUUUGCAAG GAGGAGGGCU GUAACA
```

#### OS02G0116000 SPLICE PRODUCT II

```
0  UGAUGGAGAC AUGAGGGUUG AAGCAACACA ACACAGGGAU AUAAGGCGCU
51  ACAAGUGUGA AUUUGCACG GUUGUUAGGU CAAAAAUG UCUCAUCCGA
101 GCUCACAUGG UGCUCAUCA UAAGGAAGAA CUGGACAAAU CGGAAAUCUA
151 CAAGUCAAAU GGGAAAAGG UUGUUCAUGA AGGUGACCAC ACCUGCCAAG
201 AGUGUGGUGC UUCUUCAG AAGCCAGCUC AUCUGAAGCA GCAUAUGCAA
251 AGUCACUCUG AUGAGGAUUA AGAUUCUJAA CUGUGUGAAG CAUUGGAUCC
301 CAAAGAACUC CAAAUGCGA UGAGGCAUAU UUAUCUUGU CUGGACUAGU
351 AACAGGUUGG GAUGACCACC UGUGAAGCUC CAACAGGAUU GCCUCCUCAC
401 GCUCUUUCAG GAGAGAUCCG UCAUUUGCCC ACUUGAAGAC UGCCUUUCA
451 GCUACAUAU GAAAGAUCA UUGAACCGUC AUAUGCUUA GCAUCAAGG
501 AAGUUGUUUA CCUGCUCUAU GGAUGGUUGU GGUAGGAAGU UCAGUGUAAA
551 GGCAAUAU CAAAGGCAU UAAAGGAAU CCAUGAGGAU GAAACUGCCA
601 CUAAAAGCAA CCGGCAGUUU GUUUGCAAGG AGGAGGGCUG UAACA
```

**OS05G0121400**

First cassette sequence, second cassette sequence

Precursor mRNA sequence

1 GGUUCGAGUC GAGGGUUUCU CCUUCUCCCA GUGCGCCGCC GUCGCCAACA  
 51 UCUGGAGCCU CGCGGAGCCG CUGAUUCAGC GAAUUCUCU GCAAUUAGAG  
 101 GUAAUCCUCU GCUUAUUCAC GCCGCGUGUA GCGCGGAUUU CGGUGAUUUU  
 151 GGUUGAUUUG GUUGUGAUUU UGCUCGUUUA GUGUGUUUUG UGACGCGAAU  
 201 UUUGGGGGAU UGUUUUGGUC AGAGAUGGGG AGCGUGGAGC UCGGAGCGGA  
 251 GGAAAGGGAG GUCGCCGGCG GGGAGGGGGG GAGCAAGGGG GCGGCGCCUC  
 301 CUGCUAGGGA UAUUAGGCGG UACAAGUGCG AUUUCUGCAG UGUCGUCGCU  
 351 UCCAAGAAGG GGUUGAUCCG UGCCCACGUC CUCGAACACC AUAAGGUCG  
 401 UCAUGGCGUC UCUCGCUUCA UAGUUCAGAA CCUCAGAUGC GUCUAGUGGU  
 451 CAUAUUCUCU GUCGUUUGGC UGCUCGCCAC GGUGGUUGGU UACUUGAUG  
 501 GAUGAAUGAU UGACUGUUUG GUUUUGCGG UGCUGCUAUU UGUGUUUUUA  
 551 GGAUGAAGUG GAUGAUUUGG AUGAUUACUU GGGACGUGGU GCGGCGGAGA  
 601 CGUGCAAAGA GAUGGACCAU GAUUGCAAGG UGUGCGGUGC UAGUUUUUAG  
 651 AAGCCGGCCC AUUUGAGGCA ACACAUGCAG AGCCAUUCAC UUGAGGUAUC  
 701 UGAAUUUCGA UACAUGUUCA CUGAAAUGAU CAAGUUCUUU GCGCGAUGUG  
 751 AUAGAUGCUA UGUGUUUCUC UGUUCAGAGU AUUACUUGCA AUAGCUGUGA  
 801 UAGAUGCUCU GUCCUAUGUA GGGACUAGGG AUGGUGAUAG UUAUGCUGUG  
 851 UUGACAGCAA AUUUCUCCUG ACAGUAAUA GUUGUCGUUU CACUCCUUUU  
 901 UUGGUUGGGU AGGUUUUGU AUCUAUGCUG AUUUUUGCAG ACUAUUUCAC  
 951 UAUUUUGUUA CAUAUGGAUG UGUGAAGCAU UGGAUCCAG AGAACUCCAA  
 1001 AAUGCAGAGAA GGCCUUGA GU GACUAGUAC CAGGAUGGGG AGACCCUUCU  
 1051 GGAAGCUCU UUCAAGAAUG CCUCUUUCAC GCUCUUCUUC AGGUGAUUUU  
 1101 UUCUGUUGCA AAAACUCGCU UGCUCUAUGC UACUGCUGUU AUUGUUACGU  
 1151 GCGCUGCAUU CUUAGUUUUU CCAAGCUAUU GAAGGAUCUU UUCUUACGCG  
 1201 CAAGUCUACU GUUGAAGAAC UGCAUGCUGA GCGCUGUUGG UUGUAUCUAA  
 1251 UGCAAGCACC ACUUGAUGGU CUUUUGAUC AACAGUUAAC CAAGUAGGUA  
 1301 GAGCAUGUAC ACUGAAGAGA UAGCUAUGCU UGUGAUGGAA UAACCAGCUC  
 1351 CUCGUUUUCC CCUUUAGUGU AAAAGACGUG UAUCUGUCCU GUUCAGUGAA  
 1401 UAUUCUACAC AACAAACAAA ACAUUACUC AUUUGAAAGU UAAUUCAAAGU  
 1451 AUAUAGGUU AGGUUCCAUU UGCUCUCUG UUUCGUUGGA UUAGUGCAUG  
 1501 GCCUAUUGUG GUUUCUGUA UAUUUUGAUU UUGGCAGACU AUUAUAGACU  
 1551 GCGUGAAGCA UUGGAUCCCA AAGAUCUCA AAAUGCGUGA AGGCUUUGAA  
 1601 UGACUAGUA UCAGGAUGGG GAGACUCUCC UGAGAAGCUC CAUCAAGAAU  
 1651 GCCUCGUUCA CACACUUUUU CAGGUUUGCU UGUUCAUUUC AAAUUGCUCA  
 1701 UUCUAAGACU UGAUUUUGUU CCAACUGUUG UUAUUACUUA CAGUGAUUG  
 1751 UACGUACUGA GAUAUUGUUA UUCUCAAGCU ACUUAAGGAA CCUGUCUUAG  
 1801 AUGCAAUUC ACAGUAAGA UACACAUGUA UAUUUGUCAC UGGUAUUUGA  
 1851 CUAUUCAGC AGCUGUCUCA UUUGCAGCAU AGUAGUGUGA UUAUCGGAAC  
 1901 AGUUUUAGCA UAUUGCACUG AAUGGAUUG UGUGUACAUU GACCUACUUA  
 1951 UUUUAUGUCA AGUAAAUCAU AAAGUUCUG UUUCAGUAUA ACAUUUAAGG  
 2001 UAUUAGCUUU UGCAGAGGCC CUUUUCGUC CAUGUAGAUU GUUGCCCUU  
 2051 CAGCUAUAGC AGGAAGGACC AUUUGAACCG GCAUCUACUU ACACAUCAAG  
 2101 GAAAGCUAUU UGCAUGCCC AUGGAAGGAA GCAACCGUAA GUUCACUUA  
 2151 AAGGGUAAUA UCCAAGGCA UGUUCAGGAA AUGCAUAAAG AUGGCUCUCC  
 2201 UUGUGAAAGC AAGAAAGAGU UCAUCUGUCC UGAGGAAAAC UGUGGGAAGA  
 2251 CUUUUAAAUA UGCUUCUAG UUACAGAAGC AUGAGGAAUC ACAUGGUGAG  
 2301 AUACUUGUGU GCCAUUUUUU UCUCUACUGUC UUUAAAAGC UCAGCAACCC  
 2351 UCCUAGAUCU AUUUUAUCAU AUUAAGACUG GUUAUGUCAU CUGACACUCU  
 2401 GACUUUUUCU AUUUCUGAGC UAGAAUACUG AUUAAAACUC UUCAAGUAU  
 2451 CCUGCAAGAU ACUCCUGUUU CUUUUAAAGA UCAUUUAUCU CUUCAGAUCA  
 2501 AAUGCAUGAU UUACUUUAC UGUGCAUGCG CUGUAUGCCU GCUUUUACUU  
 2551 CCUGUGAGAA GUUGAGAAGU GAGAAUUGGU UAAUUGUGCC GUGACAUACC  
 2601 UUGUUUUACU UGUGCAGUCA AGUUGGAUUA UAGUGAAGUU AUCUGCUGUG  
 2651 AACCAGGCUG CAUGAAGGCA UUUACCAACU UGAAUUGCCU CAAGGCCAU  
 2701 AACAAAUCUU GUCAUCGACA UGUUGUCUGU GAUGUCUGUG GAACCAAACA  
 2751 GCUGAAGAAG AACUCAAAC GUCAUCAGAG AAUGCAUGAA GGUUCCUGUG  
 2801 UUACUGAGAG GGUUCGAUGC CACCUAAGG ACUGCAAGUU GUCAUUUUA  
 2851 AAGGUAAGAU UUCAUUCUU CAGGGUUGAU UCUGUUUCAC AGAAUUUUUU

Protein sequence

MGSVELGAE  
 EREVAGGEGGSKGAAPP  
 ARDIRRYKDFCSVRS  
 KKGLIRAHVLEHHK

DEVDDLDDYLGRGGGET  
 CKEMDHDCKVCGASFVK  
 PAHLRQHMQSLSLE

TIS  
 LFCYIWMCEALDPRELQ  
 NARRP!

TIYD  
 CVKHWI PKNSKMREGFE  
 WTSIRMRGLS!

RPFSCHVDGCPF  
 SYSRKDHLNRHLLTHQG  
 KLFACPMEGCNRKFTIK  
 GNIQRHVQEMHKDGSFC  
 ESKKEFICPEENCCKTF  
 KYASKLQKHEESH

VKLDYSEVIC  
 CEPGCMKAFTNLECLKA  
 HNSCHRHVVDVCGTK  
 QLKKNFKRHRQRMHEGSC  
 VTERVRCCLKDCKLSFS  
 K

2901 UAUUUCUUUC CAAUAAAUUG CAAAUUCGUUC CAUCCUUUUC AAUUUUUUUU  
 2951 UUUUGGGGGG GGGGGGGGGA CUUUGAACUG CAGAAAUCCA AUCUGGACAA  
 3001 GCAUGUGAAA GCAGUCCAUG AGCAGAAGCG ACCCUUUGUA UGUGGAUUUC  
 3051 CUGGGUGUGG CAAGAGUUUU UCGUACAAGC AUGUAAGGGA CAACCAUGAG  
 3101 AAAUCUAGUG CUCAUGUGUA CGUUCAGUA ACACAAACAA CAAUUCUGCU  
 3151 AUGAAAUAGC UGACCGAUGG UAUCUUCUUC UUGUUAACC CUUAAGAUGA  
 3201 UUAUAAUUUU CCCAUCAUUA UGUGCAGGCU AAUUUCGAAG AAUUGACGG  
 3251 GGAACGACCA CGUCAAGCAG GUGGGAGGAA GAGGAAAGCC AUACCUGUGG  
 3301 AGAGUUUGAU GCGGAAGAGG GUAGCUGCUC CUGAUGAUGA UGCCCCAGCU  
 3351 UGUGAUGAUG GAACUGAGUA UUUGAGAUGG CUUCUCUCAG GCUAUCUGU  
 3401 CGUGAACCG AAUACAGAAA UGUGAGAUCU UUGGAUAUCA AGGGUGUUGA  
 3451 UAUGGUUUGA GAUACUAGUA GCAACGUUCU UUUCUUUUGU GCAUGUAUAG  
 3501 GUAUAAACAUG GAAGUAAUUU UGAUAAGACC UCUAUGUACU GUCUCAGACA  
 3551 UCAAGUUACC AGAAGUCCAG AAUGCAGAAA CGCCAGAUCU UUAUAUGCUC  
 3601 AAGGGUGUUU AUGUGCUAGU UAGGUAGCAA CGUUCUCUCU UUUUGUAUGU  
 3651 AUAGGAAAAG UGAAAGGAAU UUUAGUAGAC CCUAAUGUCU UGUGACAGGC  
 3701 AUGGUAAUUU AUCAAGGUUG GUUUGUUCUA CAGUGU

KSNLD  
 KHVKA VHEQKRP FVCGF  
 SGC GKSFSYKHVRDNHE  
 KSSAH VYVQ  
 ANFEEIDG  
 ERPRQAGGRKRKAI PVE  
 SLMRKRVAAPDDDPAC  
 DDGUEYLRWLLSG!

RT-PCR products (from primers f and g) were cloned into TOPO vector and clones were sequenced.

Primer f: 5'-ATGATTACTTGGGACGTGGT

Primer g: 5'-GTCTTCCCACAGTTTTCC

### OS05G0121400 SPLICE PRODUCT I

1 AUGAUUACUU GGGACGUGGU GGCGGCGAGA CGUGCAAAGA GAUGGACCAU  
 51 GAUUGCAAGG UGUGCGGUGC UAGUUUUUAG AAGCCGCCCC AUUUGAGGCA  
 101 ACACAUGCAG AGCCAUUCAC UUGAGAGGCC CUUUUCCUGC CAUGUAGAUG  
 151 GUUGCCCCUU CAGCUAUAGC AGGAAGGACC AUUUGAGCCG GCAUCUACUU  
 201 ACACAUCAAG GAAAGCUAUU UGCAUGCCCC AUGGAAGGAU GCAACC GUAA  
 251 GUUCACUAUA AAGGGUAAUA UCCAAAGGCA UGUUCAGGAA AUGCAUAAAG  
 301 AUGGCUCUCC UUGUGAAAGC AAGAAAGAGU UCAUCUGUCC UGAGGAAAAC  
 351 UGUGGGAAGA C

### OS05G0121400 SPLICE PRODUCT II

1 AUGAUUACUU GGGACGUGGU GGCGGCGAGA CGUGCAAAGA GAUGGACCAU  
 51 GAUUGCAAGG UGUGCGGUGC UAGUUUUUAG AAGCCGCCCC AUUUGAGGCA  
 101 ACACAUGCAG AGCCAUUCAC UUGAGACUAU UUCACUGUUU UGUUACAUAU  
 151 GGAUGUGUGA AGCAUUGGAU CCCAGAGAAC UCCAAAUGC GAGAAGGCCU  
 201 UGAGUGGACU AGUACCAGGA UGGGGAGACC CUUCUGGGAA GCUCUUCAA  
 251 GAAUGCCUCU UUCACGCUCU UCUUCAGACU AUUAUUGGCU GCGUGAAGCA  
 301 UUGGAUCCCA AAGAACUCCA AAAUGCGUGA AGGCUUUGAA UGGACUAGUA  
 351 UCAGGAUGGG GAGACUCUCC UGAGAAGCUC CAUCAAGAAU GCCUCGUUCA  
 401 CACACUUUUU CAGAGGCCCU UUUCUGGCCA UGUAGAUGGU UGCCCCUUCA  
 451 GCUAUAGCAG GAAGGACCAU UUGAACCGGC AUCUACUAC ACAUCAAGGA  
 501 AAGCUAUUUU CAUGCCCCAU GGAAGGAUGC AACC GUAAU UCACUAUAAA  
 551 GGGUAAUAUC CAAAGGCAUG UUCAGGAAAU GCACAAAGAU GGCUCUCCUU  
 601 UGAAAGCAA GAAAGAGUUC AUCUGUCCUG AGGAAAACUG UGGAAGAC

### OS05G0121400 SPLICE PRODUCT III

1 AUGAUUACUU GGGACGUGGU GGCGGCGAGA CGUGCAAAGA GAUGGACCAU  
 51 GAUUGCAAGG UGUGCGGUGC UAGUUUUUAG AAGCCGCCCC AUUUGAGGCA  
 101 ACACAUGCAG AGCCAUUCAC UUGAGACUAU AUUAGCUCG GUGAAGCAU  
 151 GGAUCCCAA GAACUCCAAA AUGCGUGAUG GCUUUGAAUG GACUAGUAUC  
 201 AGGAUGGGGA GACUCUCCUG AAGAGCUCCA UCAAGAAUGC CUCGUUCACA  
 251 CACUUUUUCA GAGGCCUUU UCCUGCCAUG UAGAUGGUUG CCCCUCAGC  
 301 UAUAGCAGGA AGGACCAUUU GAACCGGCAU CUACUACAC AUCAAGGAAA  
 351 GCUAUUUGCA UGCCCCAUGG AAGGAUGCAA CCGUAAGUUC ACUAUAAAGG  
 401 GUAAUAUCCA AAGGCAUGUU CAGGAAUUGC AUAAAGAUGG CUCUCCUUGU  
 451 GAAAGCAAGA AAGAGUUCAU CUGUCCUGAG GAAAACUGUG GGA



## Supplementary Figure 5. Expression of Flag-tagged versions of L5, TFIIIA, and L7 proteins

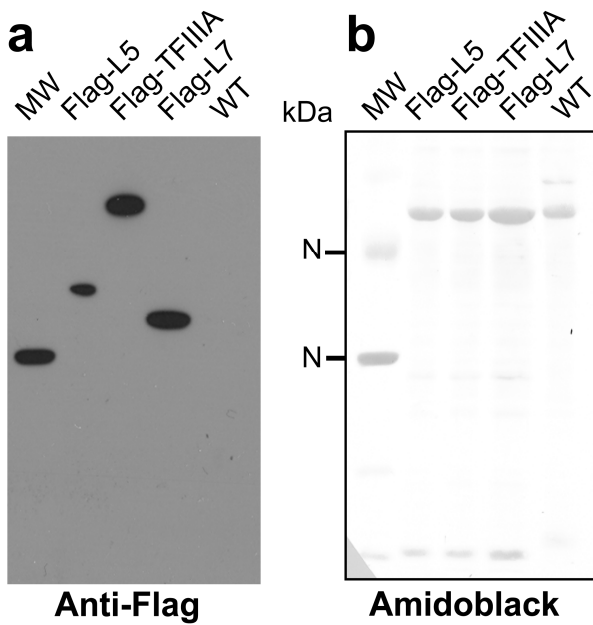

(a) Western blot analysis of crude extracts from *N. benthamiana* infiltrated with Flag-L5, Flag-TFIIIA, Flag-L7 coding sequence constructs, or none (WT). A Flag peptide sequence was inserted at the N-terminus after the start codon and does not change the effect on Pre-EGFP reporter splicing (data not shown). The immunoblot was probed with anti-Flag antiserum. The 30 kDa molecular weight marker (MW) protein cross-reacts with the antibody. The molecular weights for the detected proteins were estimated using a standard curve for all marker bands (expected sizes in parentheses): Flag-L5 32 kDa (36 kDa), Flag-TFIIIA 50 kDa (48 kDa), Flag-L7 28 kDa (30 kDa).

(b) Amidoblack staining of the western blot shown in a, which visualizes all proteins present on the blot. The major band in the plant extracts corresponds to Rubisco.

The expression of all three proteins tested for an effect on TFIIIA reporter was confirmed by western blot analysis. In general, somewhat less L5 is expressed than TFIIIA or L7, but it alone has an effect on reporter splicing and expression (Fig. 3a, c). No protein was detected by anti-Flag probing of crude extracts from wild-type *N. benthamiana* plants. Roughly equal loading of crude extracts in all lanes is shown by amidoblack staining and comparison of the main band corresponding to the highly abundant protein Rubisco (large subunit).

## Supplementary Figure 6. GST-AtL5 fusion protein binds to 5S rRNA *in vitro*

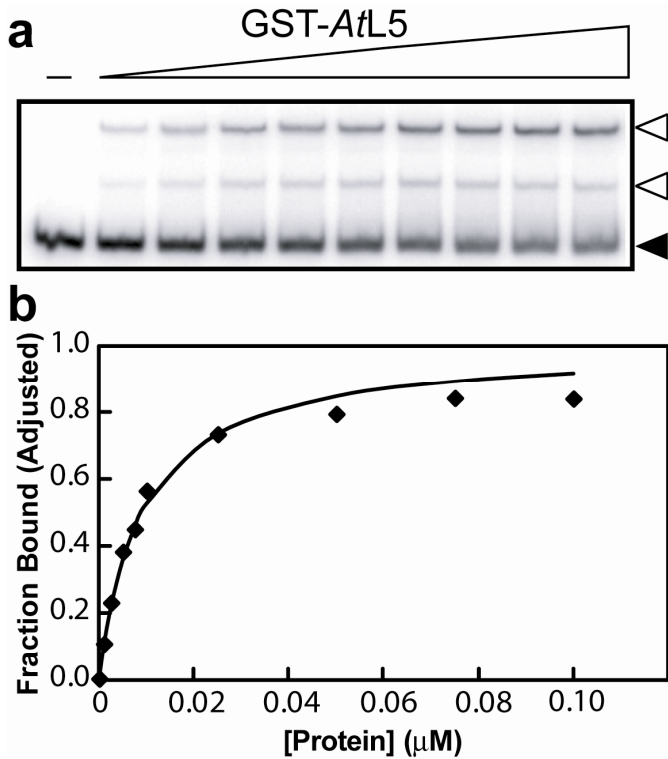

(a) *In vitro* binding analysis for 5S rRNA with GST-AtL5. Sequence used is the major 5S transcript identified in *A. thaliana*<sup>9</sup>. Radiolabeled RNA was incubated at 25°C in binding buffer in the absence or presence of protein (0-0.1  $\mu\text{M}$ ). RNA-protein complex formation was analyzed by non-denaturing PAGE. Unbound RNA (filled arrowhead) and RNA-protein complexes (open arrowhead) are indicated. Similar to previous data<sup>9</sup>, two bands corresponding to RNA-protein complexes are observed which have similar binding characteristics. This suggests that the RNA fold may be heterogeneous but still bind the protein. Additionally, ~50% of the RNA remains unbound at saturating concentrations of protein, even with optimized renaturation protocols.

(b) Representative plot used to determine the apparent  $K_D$  for the interaction between 5S rRNA and GST-AtL5 protein. Maximal binding observed at 0.5  $\mu\text{M}$  protein was normalized to 1. Graphed line corresponds to the best-fit curve for a two-state binding model with 1:1 stoichiometry and  $K_D$  of 9 nM. Analysis of either of the two RNP signals or a summation of both give similar results for the apparent  $K_D$ .

Supplementary Figure 7. In-line probing of *A. thaliana* P5SM RNA mutants

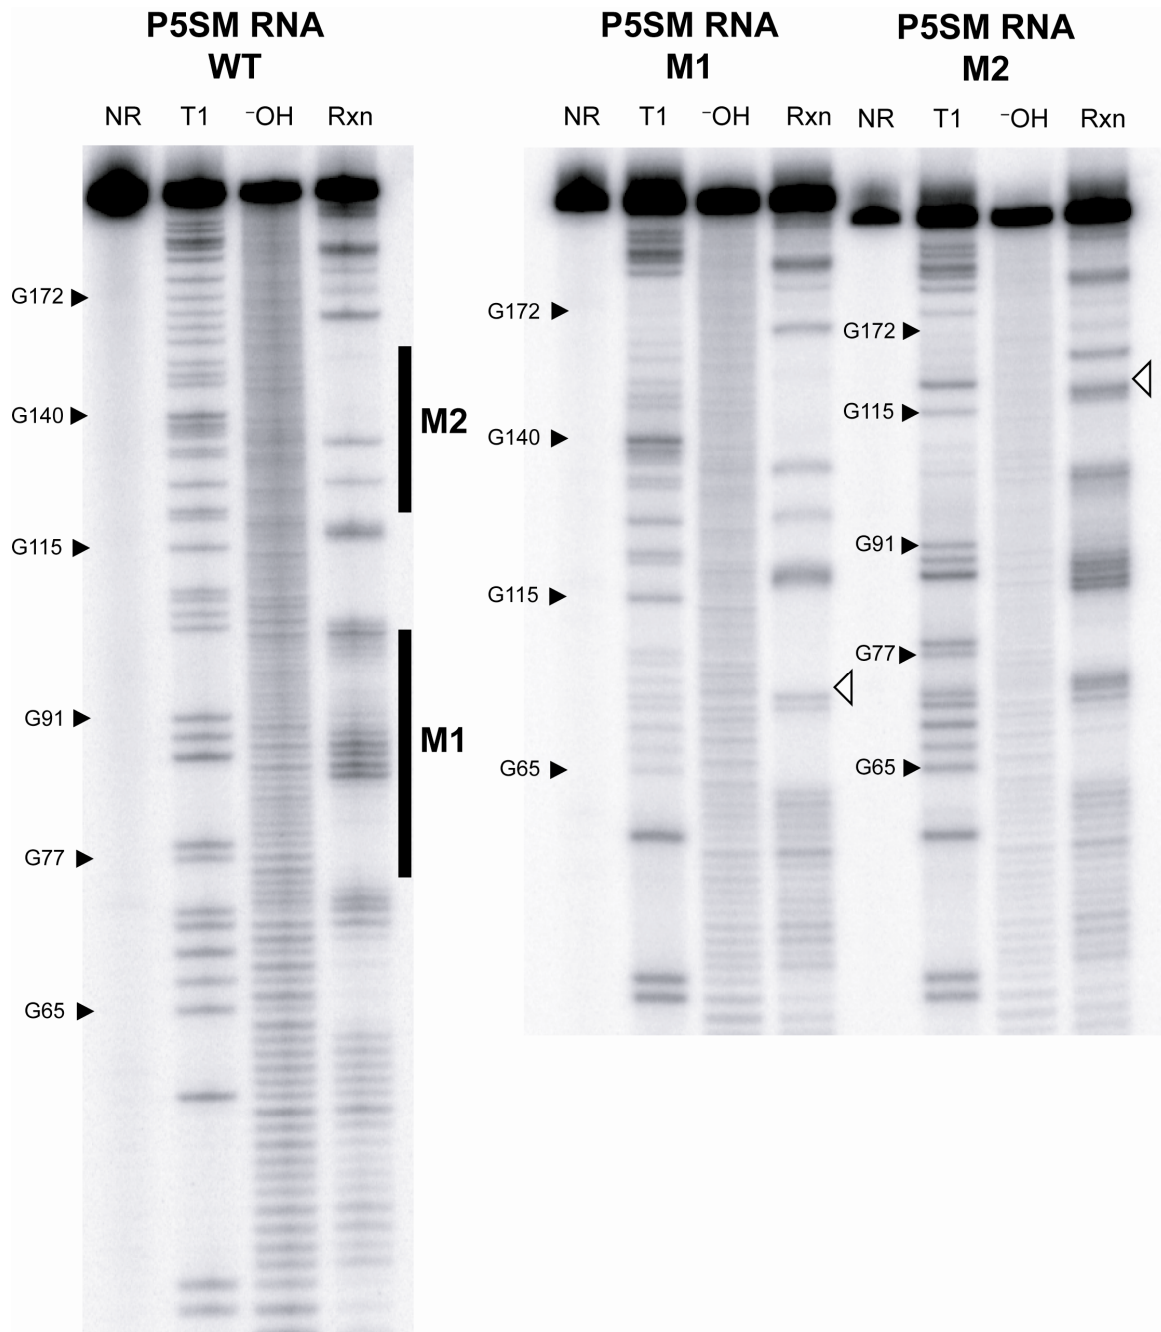

Comparison of in-line patterns between wild-type P5SM RNA (nucleotides 603-810 of *AfTFIIIA* gene, NCBI gi 42592260) and truncated constructs show that deletion of the designated regions (M1 and M2, **Fig. 5a**) of the RNA do not perturb the other parts of the RNA. A white arrowhead indicates the location of each truncation. The unperturbed portions of the RNAs remain well-folded and have similar patterns of spontaneous cleavage compared to WT except missing the indicated deletion region.

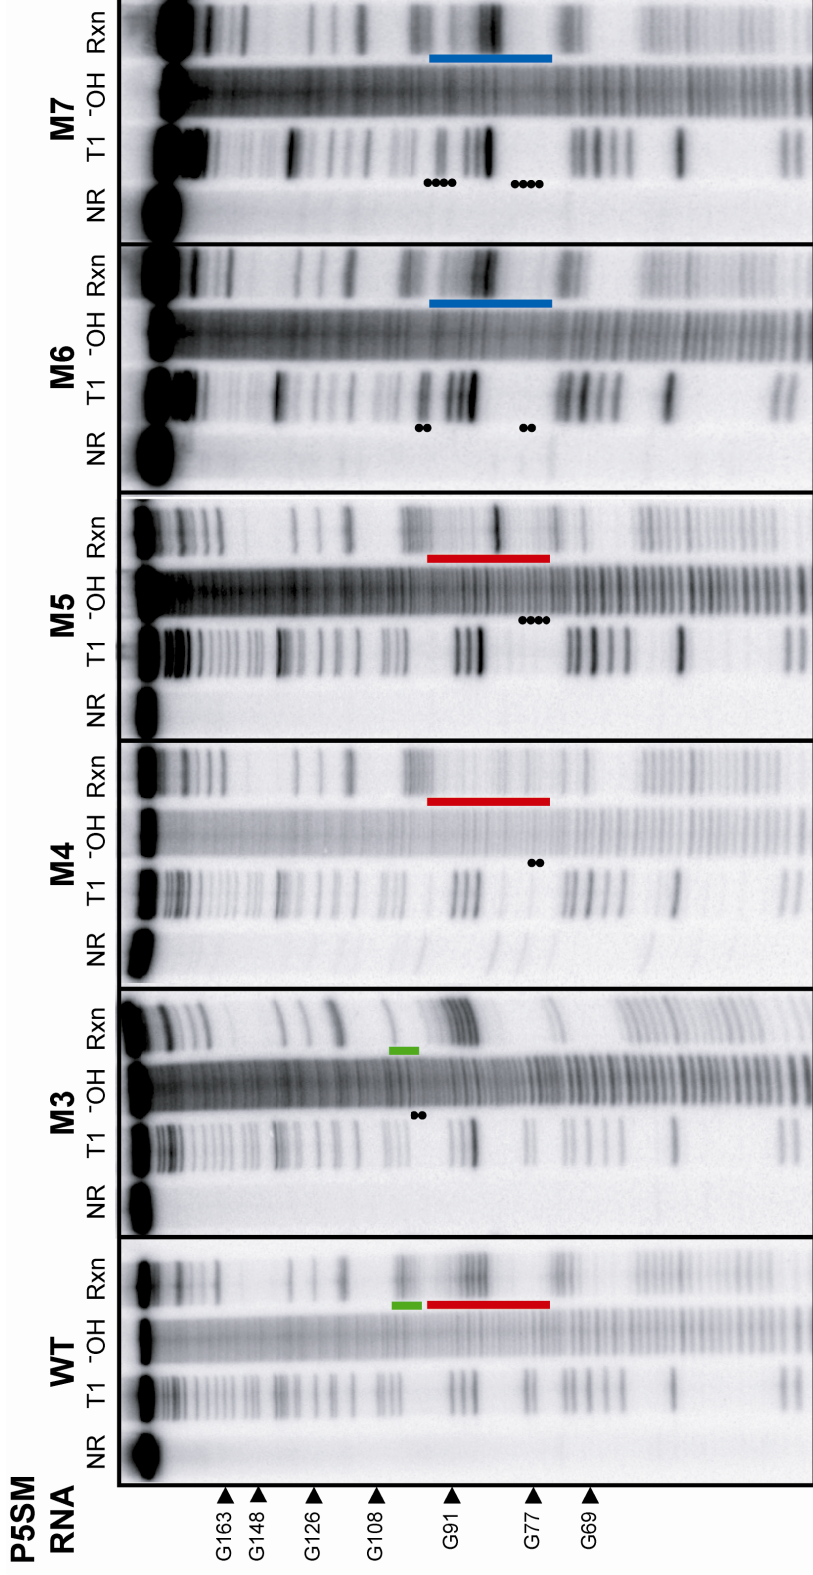

Comparison of in-line patterns between wild-type P5SM RNA and mutant constructs with nucleotide changes in the P2 stem (M3 through M7, **Fig. 5a**) show expected changes in structure confined to the P2 stem. Positions of labeled G nucleotides are the same as shown for the shorter construct in **Fig. 1b**. Nucleotide deletions or substitutions are mapped by black dots. Colored bars indicate regions for comparison between WT and a corresponding mutant.

Deletion of the dinucleotide bulge (M3) results in a more stable hairpin structure, indicated by reduced spontaneous phosphoester cleavage in the stem region surrounding the deleted AA (green bars). In contrast, nucleotide substitutions that disrupt base pairing (M4, M5) destabilize the normal P2 stem structure, indicated by increased spontaneous cleavage overall in the stem region and alterations in the cleavage pattern (red bars). Finally, nucleotide substitutions that compensate for base pairing (M6, M7) restore very similar in-line patterns to WT (blue bars).



**Supplementary Figure 8. The interaction of 5S rRNA with ribosomal proteins L18 (L5 homolog) and L30 (L7 homolog) in the *Haloarcula marismortui* large ribosomal subunit**

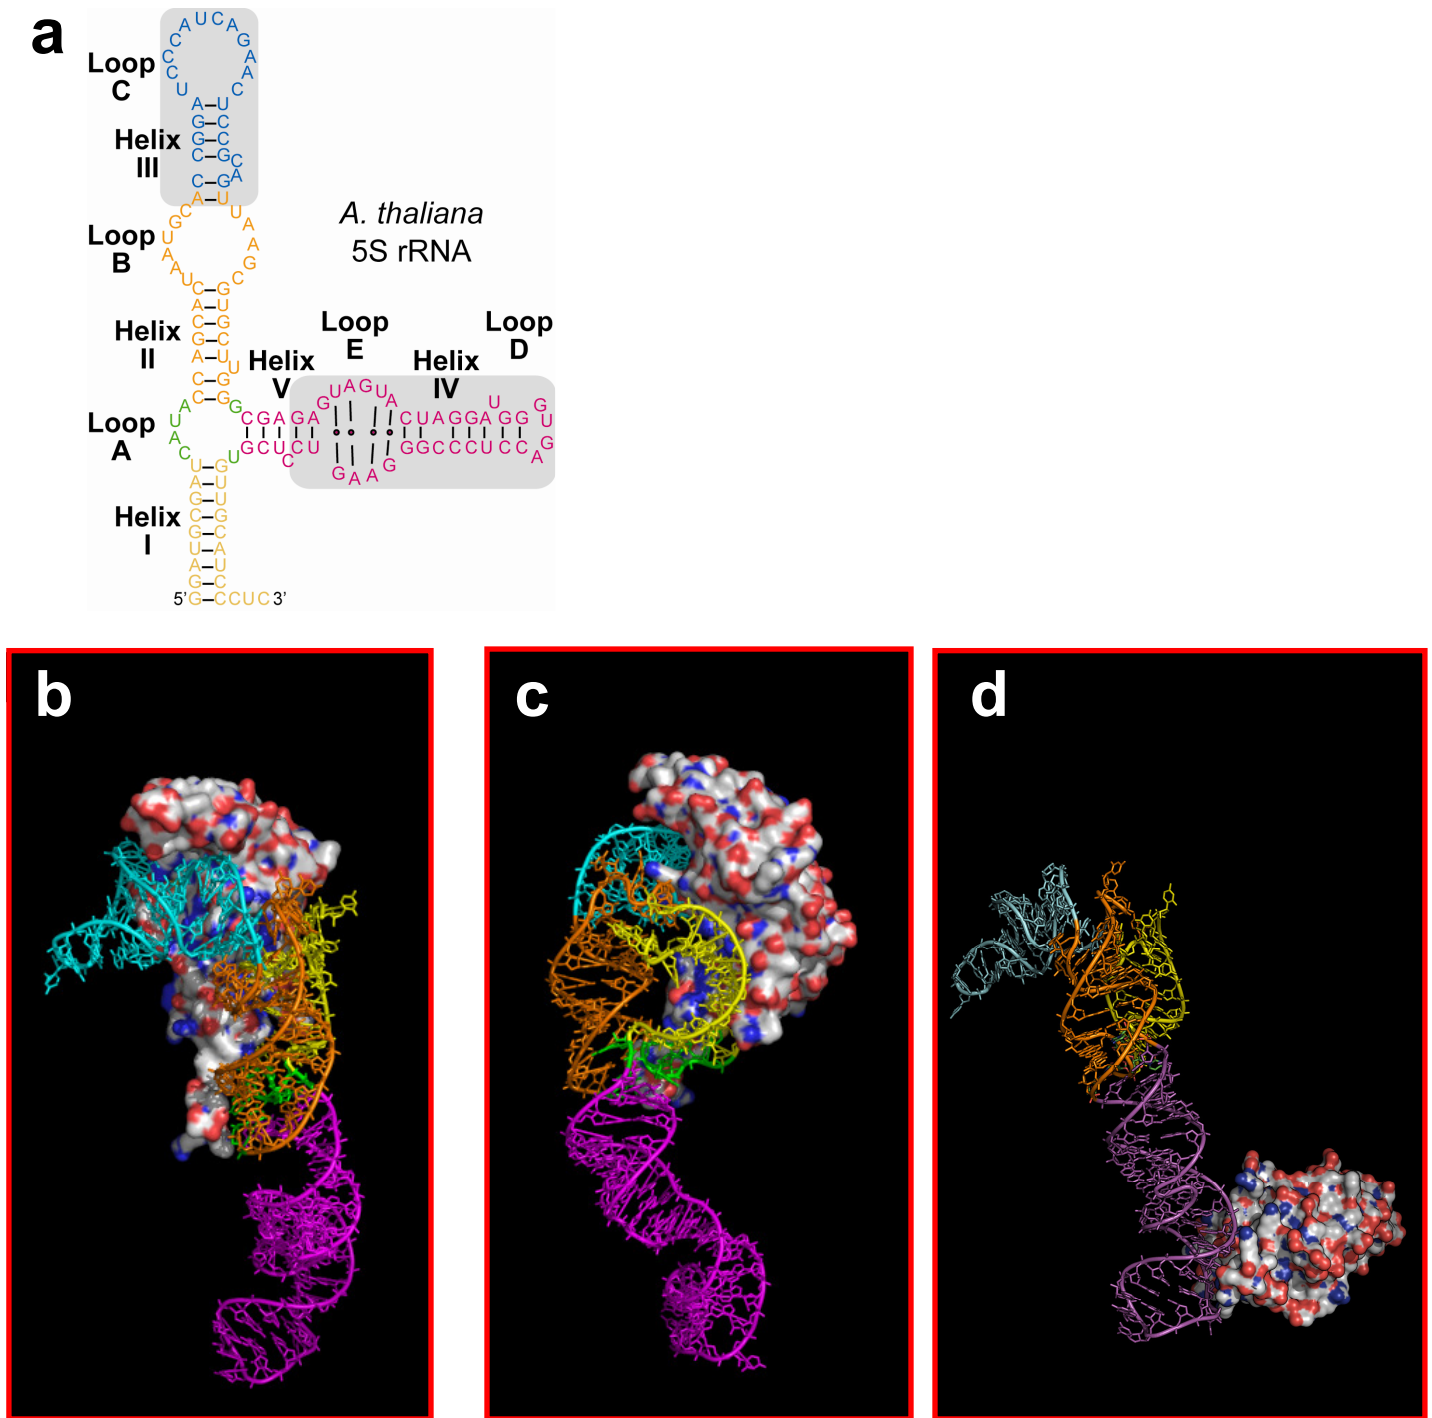

Atomic coordinates used to make figures are from the crystal structure of the large ribosomal subunit (pdb accession code 1QVG, chain 9 = 5S rRNA, chain M = L18P, the homolog to L5, chain V = L30P, the homolog to L7)<sup>10</sup>.

(a) Conventional 5S rRNA structure model colored in accordance with panels and with regions homologous to P5SM boxed in grey; (b) view highlighting the 5S rRNA helix III interaction with L5; (c) second view highlighting the 5S rRNA helix I interaction with L5 and showing that helix II is not in contact with the protein; (d) third view highlighting the 5S rRNA loop E interaction with L7.

P5SM does not have a region strongly homologous to helix I, which may account for lower affinity in the P5SM-L5 interaction. Other structural features, such as the conserved but distinct P1 (**Fig. 1c**), may partially substitute for helix I, whose length has been shown to be important for complex formation in yeast<sup>11</sup>, but allow L5 to bind P5SM in the context of a long pre-mRNA.

**Supplementary Figure 9. The relative protein expression of P5SM mutant reporters reflects their splicing patterns**

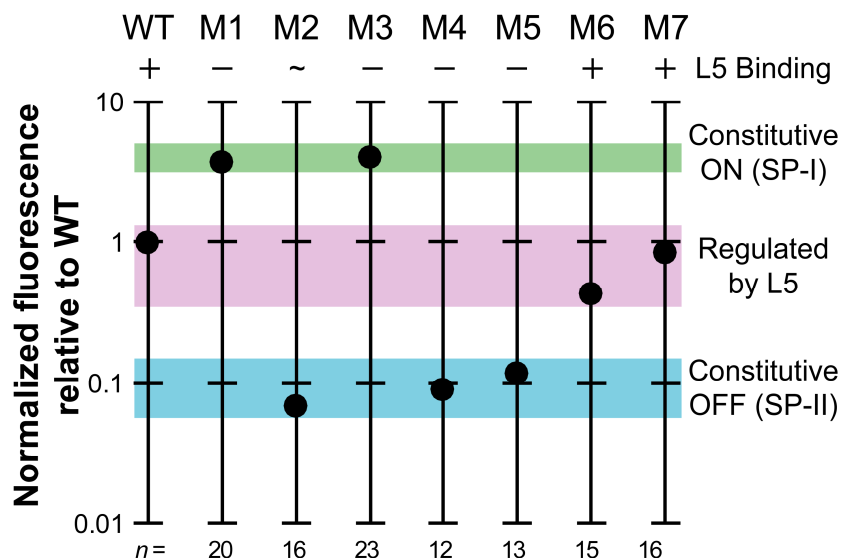

Reporter fluorescence for mutants normalized to WT Pre-EGFP are shown on a semi-log plot. WT and each mutant reporter construct was transformed on half of the same leaf to ensure near identical conditions for comparison. Effects from varying endogenous L5 levels were minimized by measuring reporter fluorescences upon constitutive *AtL5* expression. Thus, the data from this figure corresponds to the filled bars in **Fig. 5d**, except that the former is normalized to WT + *AtL5* and the latter is normalized to + LUC for each construct separately. Numbers of independent leaf samples (*n*) measured are shown. Error bars representing SEM are within the diameter of the symbols.

The observed protein expression relative to WT corresponds to the three splicing pattern types labeled in the different colors, which are also shown for a representative leaf sample in **Fig. 5d**.

**Supplementary Figure 10. Replacement of the purine-rich loop sequence in L2 causes constitutive exon skipping without loss of L5 binding**

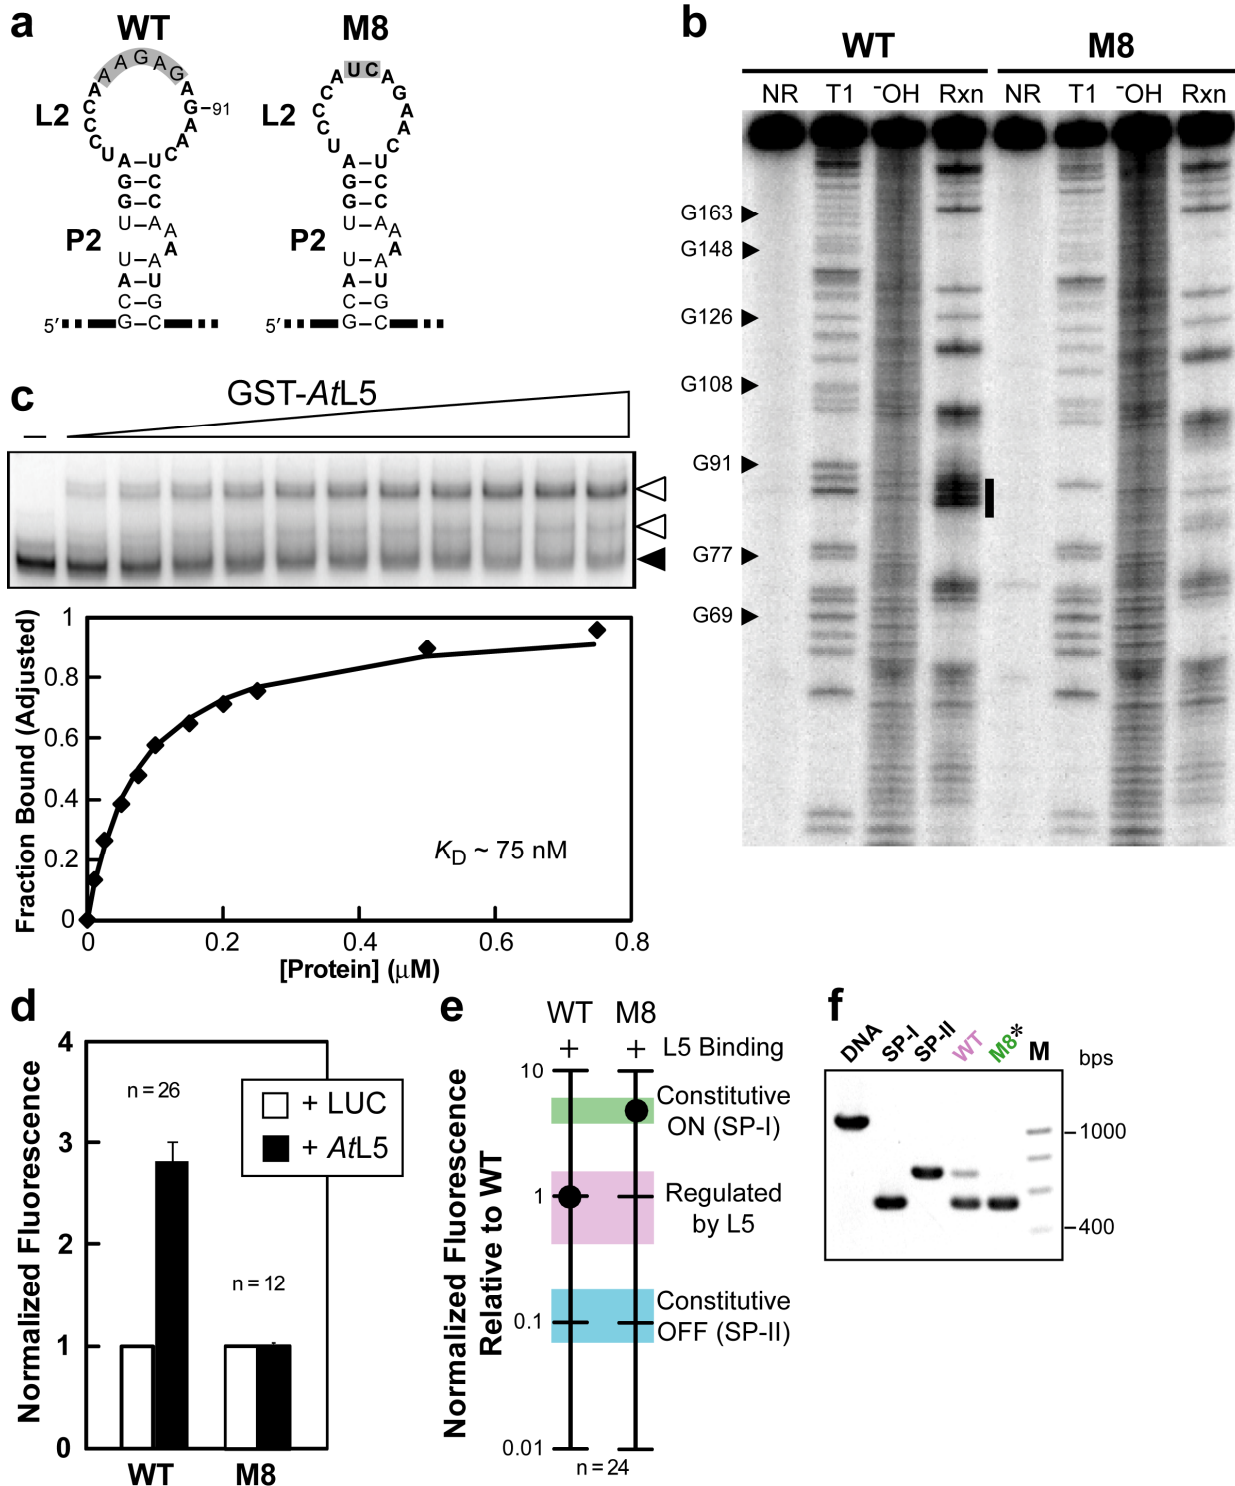

(a) Partial sequence of the L2 mutant (M8) compared to wild-type (WT) P5SM RNA with the altered nucleotides shaded. Bolded nucleotides are identical to the *A. thaliana* 5S rRNA sequence.

(b) Comparison of RNA cleavage patterns from in-line probing between WT and M8 P5SM constructs show that changes in structure are confined to L2. The labeled G nucleotides correspond to the same positions labeled for the shorter construct in Fig. 1b. Black bars indicate the location of nucleotide changes. Note that the pattern for M8 is shifted down from the adjacent pattern for WT above this region because these 5' cleavage products include the deletion, which shortens the length of M8 relative to WT.

- (c) *In vitro* binding analysis for the M8 P5SM RNA with GST-AtL5. The same methods were used as described in **Fig. 4**. As observed for 5S rRNA in **Supplementary Fig. 6**, two bands corresponding to RNA-protein complexes are observed, suggesting that the RNA fold may be heterogenous but still binds the protein. Also shown is a representative plot used to determine the apparent  $K_D$  for the interaction between M8 P5SM RNA and GST-AtL5 protein. Maximal binding observed at 1  $\mu$ M was normalized to 1. Graphed line corresponds to the best-fit curve for a two-state binding model with 1:1 stoichiometry and  $K_D$  of 75 nM.
- (d) *In vivo* expression analysis for the Pre-EGFP reporter construct incorporating the M8 mutation in P5SM with co-expression of AtL5. Data for the Pre-EGFP WT construct (from **Fig. 3c**) is shown for reference. For each construct, the EGFP fluorescence measured with expression of luciferase (LUC) was set to a value of 1. Number of independent leaf samples ( $n$ ) measured are shown. Error bars represent SEM.
- (e) Reporter fluorescence for the M8 mutant normalized to WT Pre-EGFP shown on a semi-log plot. WT and M8 were transformed on half of the same leaf to ensure near identical conditions for comparison. Effects from varying endogenous L5 levels were minimized by measuring reporter fluorescences upon constitutive AtL5 expression. Number of independent leaf samples ( $n$ ) measured are shown. Error bars representing SEM are within the diameter of the symbols.
- (f) RT-PCR detection of splice products arising from splicing of WT versus M8\* Pre-EGFP reporter constructs. The M8\* construct is identical in sequence to the M8 construct analyzed in **d** and **e**, except for two single-nucleotide mutations in the constitutive intronic region. These additional mutations do not affect reporter splicing, as the protein expression results for M8\* were the same as for M8. This set consists of WT and M8\* from a representative leaf sample, in which AtL5 was over-expressed. The color coding corresponds to the splicing pattern types labelled in **e**. Also shown are PCR products corresponding to unspliced precursor, SP-IE, and SP-IIE derived from DNA templates.

Based upon a displacement model for splicing regulation by ribosomal protein L5, the purine-rich insertion in the L2 loop of P5SM was postulated to be an exon splicing enhancer (ESE) that binds a splice factor to favor exon definition and splicing to SP-II. To test its proposed role as an ESE with minimal perturbations to other functions of the RNA, the five purine nucleotides were replaced with the UC sequence from Loop C of 5S rRNA. As expected, the replacement mutant M8 still binds L5, with comparable affinity as the WT P5SM and changes to the structure are confined to the L2 region. However, unlike all other previously tested P5SM reporter constructs that bound L5 (WT, M6, M7), loss of the purine-rich sequence causes loss of L5 activation and constitutive splicing to SP-I, as observed by reporter fluorescence and RT-PCR. These results support a role for this sequence in exon definition, possibly as an ESE that recruits an exonic splice factor.



**Supplementary Figure 11. The two TFIIIA genes in *O. sativa*, *Zea mays*, and *Triticum aestivum* may be differentially regulated by a single or tandem arrangement of the P5SM element**

(a) Two TFIIIA genes (OS02G0116000 and OS05G0121400) were identified in the *O. sativa* genome, shown is the comparison of the annotated splicing models; (b) RT-PCR analysis of OS05G0121400, the rice TFIIIA gene containing the tandem P5SM arrangement detected three main splice types (SP-I, SP-II, and SP-III) but not the fourth predicted splice type (splice reaction in grey); see Figure S4 for sequences of the gene, the translated protein, and the splice products detected by RT-PCR for OS02G0116000 and OS05G0121400; (c) sequences of SP-II type transcripts for the homologous two TFIIIA genes in *Zea mays* and *Triticum aestivum* (from EST or cDNA data). Cassette exon is highlighted in blue; P5SM sequences are underlined.

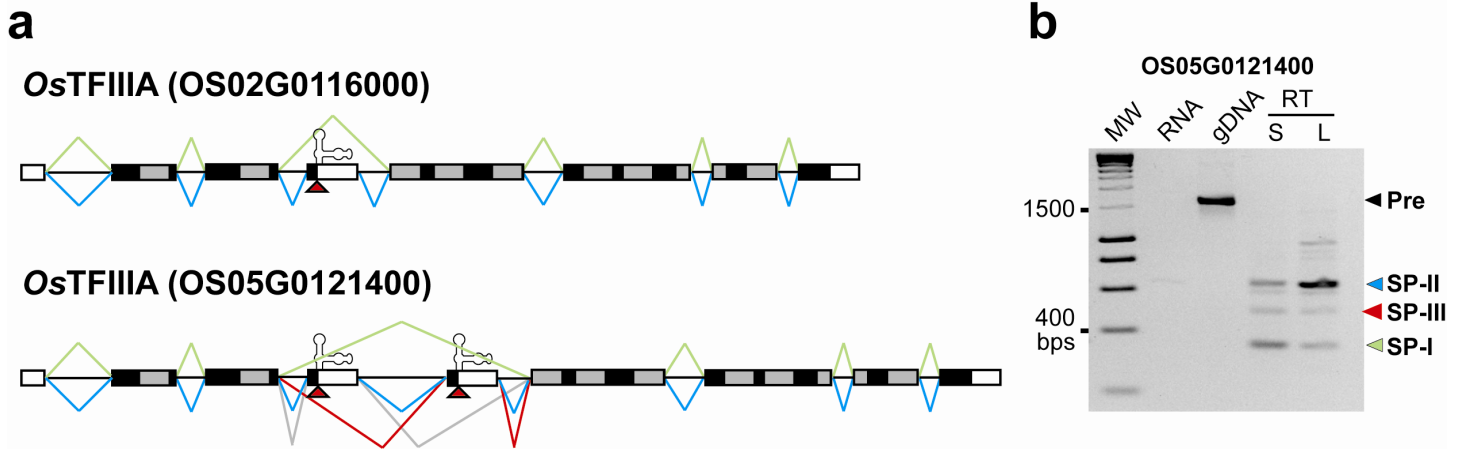

**c**

Tae 20437489 (corresponds to SP-II type transcript)  
 Contains single P5SM

```

1 CCACGCGTCC GCCCACGCGT CCGCACGAGG GAGCGGCGTC ATCCCCAGCT CCGTTCCCCA
61 CGGCCGCACC CTCCGCCTCC GCCTCCGAAC CCACGATGTC TTCTGGAGAT GGGATCGATG
121 GAGATGAGAA GTCTGAAGAG ACACATGGCA AAGATATTAG ACGCATCAAG TGTGAATTTT
181 GCACTGTTGT TAGGTCCAAG ATGTATCTCA TACGAGCTCA CATGGTAGCT CAGCACAAGG
241 ATGAGTTGGA CGCATCAGAA ATCTATGACT CAAATGGTGA AAAGGTTGTT TATGGGGTTG
301 GACACACATG TGAAGAGTGT GGAGCTTGTT TCCGGAAGCC AGCTCATCTG AAGCAGCATA
361 TGCAAAGTCA TTCCAAAGAG GGTTTAGATA ATAGATACTT AACAGCGTGA AGCATTGGAT
421 CCCATTACAG AACTCCAAA TGCATGGAGG CACATTTTAA TCTTGGTTGG ACTAGTAACA
481 GGTTGGGATG ACCTCCTGTG AAGCTCCAAC AAGATTGCCT CCTTCACGCT TACTCAGGAG
541 AGATCCTTCG CCTGCCACT TGAAGACTGC CCCTTCAGCT ATATAAGAAA AGATCACTTG
601 AACC GG CATA TGCTTACACA TGAGGGCAAG TTGTTTACAT GCCTC
    
```

Tae 141663088 (corresponds to SP-II type transcript)  
 Contains tandem P5SM

```

0 GCAGCGTCGT CGGAGCGACG GAGACCTCGA CCTCGCCGGC GGCCGCGGGC
50 GCCGCCCTTG TGAGGGACAT CAGGCGGTAC AAGTGCAGAT TCTGCGACGT
100 CGTGCGCTCG AAGAAGCGGC TGATCCGAGA CCACGTCCTC GAGCACCATA
150 AGGACGAAGT GGATGGTCTG AATGAGTACA ACGTAGGTGG TGGTGGCGGC
200 AGTGCGCCGC CGGGCAAGGA GATCGGCCAT GATTGCAAGG AGTGCGGCGC
250 GAGGTTAAG AAGCCGGCGC ATCTGAAGCA GCATATGCAG AGCCATTTCG
300 CCGAGGCTGT TTAATTGTGT GAAGCATTGG ATCCCAAAGA ACTCCAAAAT
350 GCGAGAGGGC CCTGAATGGA CTAGTACCAG GATGGGGAGA CCCTCCTGGG
400 AAGCTCCTTC AGGAAGCCTC TTTCACGCC TTCTTCAGAC TACATGTTCA
450 GATATGAATG TGTGAAGCAT TGGATCCCAA GAACTCCAAA ATGCCAGAAG
500 GCCTTGAATG GACCAGTATC AGGAAGGGGA GACCCTCCTG AGAAGCTCCA
550 TCAAGAATGC CTCATTACG CGCTTCCTCA GAGACCCTTT GCCTGCCATG
600 TAGATGGTTG CCCTTTCAGC TATAGCAGGA AGGACCATTG GAACCGCCAT
650 CTGCTTACTC ATCAAGGAAA ACTATTCATG TGCCCTATGG AAGGATGCAA
    
```

700 CCGTAAGTTC AGTATCAAGG GTAATATCCA GAGACATGTT GAGGAATTTCC  
750 ACGAGGATGG CCCTCGTTGT GGAGGCAAGA AAGAGTTCAT CTGCCAGAG  
800 GCTAACTGTG GGAAG

Zma 157151872 (Chr 8 contig)  
Contains single P5SM

Chr 8 Contig 27601..37898

Exons are based upon manual alignment of available ESTs to genomic sequence  
Sequences highlighted in red are inconclusive from available ESTs

34021 TGTCAGATGT GTTCTGAAGT TCATGTTGAG GGAGATGCAA GTGTCGGACA GAAGGGTTGC  
34081 AAGGATATAA GGCCTTACAA ATGTGAATTT TGCACAGTTG TCAGGTCAAA GAAATGCCTA  
34141 ATTCAAGCTC ACATGGTTGC ACATCATAAG GTATAAACAT TTTGTGATAT ATTGACACAT  
34201 TAGTCGATAT ATATCCTGTT TGATTGCATA GCTATGCACC ATCTATATTA TGACACATTA  
34261 TTTACCTTTT GATGTCTGCC TTCATATTAT TGTTGTTTTG GAGCAATACA TAGCATCTCT  
34321 AATGTTTTCT GAAAATTATC TGCAGGATGA ACTTGATAAA TCAGAAATAT ACAACTCAGA  
34381 TGGGGAAAAG ATTGTTTCATG AGCAGGAACA TAGGTGCCAA GAGTGTGGCC GTTGTTTCCA  
34441 GAAACCAGCT CATCTGAAGC AGCACATGCA AAGTCACTCA CATGAGGTTG GTATTCATCT  
34501 CCTCAAATTA AGCATGAGCT TGCTCTTTTT ATTTTGTGG CACTGGTTGC CCCCATTTC  
34561 ACTTTTGAAG TATACAGACA TACAGACATG ATGATTTGCA TTCATGACTT ATGAGGCTGG  
34621 TTGTAATAGT GATTTTCCCA CTATGATTTG CTAATGCAG TTGTTTTGCA GGGCATAGAT  
34681 AGTTAACAGC GTGAAGCATT GGATCCCATT TAAAGAACTC CAAAATGCGA CGAGGTATTT  
34741 TTTATTCTTG CCTGAAGTAG TAACAGGTTG GGATGACCTC CTGTGAAGCT TCAACAAGAT  
34801 TGCCTCAGTC ACGCTCACTG AGTAGGTTTG TTCTTGATCA AAATTAGTTT TTTATCATGA  
34861 TGCTCATAGT CTAAATTCTG CATTTCATGT CACATCATGAT TGTTTTTCAGT GTTAGTATGT  
34921 ATTGTGCCTT CTCATATGGG CCAATTCAGT GAATTATGGA GTTTTTTTTA TTTCTTTGTT  
34981 CTTCTGACTT GGGGGCCTTT AGTTGTGTCA ATCTGGTGAT CAAACATCAA AATATTTTCTG  
35041 AAAGCTTGGT CTTCACTTTA TAAGTTCTCT TATTACCTCT AATTTTCTTT AGTGTCTTTA  
35101 GGATTAGATG GGGTATGGAT CTTGGAGATA AGGCTGAAAA ATATCCTCCC ATCATTCTGC  
35161 CATGTCTCCA TGGGCTTCTT TATGGGAGCT CTGATGTAAT GCTTGAGGAT CCAATATCAA  
35221 AATGTCATCT CAGAAAGCTA GGCCATTCT TCATTGGCTC TCAGCTCGCT ATGGTGACAA  
35281 TAGTCCTAAA ACCGTGTTAT TTTGCAATTA AAAAATGATG AAGTGAAGTT GCTATAATCC  
35341 TGTAAGGATT ATATGGGTTA TGGATCTTTT GGAGATAAGG GTGGAAATAT CCTCCCTTCA  
35401 TTCTGCCATG TCATAAAGGG CTTCTTAATG GGAGCTTCCA GAAGATGCTT TAGGATCCAA  
35461 TATCAAAATG TCGTCTCAGA AAGCTGTGGC CATTCTGCAT TGGTTCTCAG CTCGCTATGG  
35521 TGACAATAGT CCTGTATCGT CTCATTATGC AAGAACAGAT GACTGAATG GAAGTGCTGA  
35581 ACTTGTTATA GTTTGTTGAG AAGGCTTTAG CATTAGTTT TTCTTTATTA TAGATTCATA  
35641 GTTCAAAAGT AGATGCATTT ACCTTATAAT TTTAGCAGG TTTTTTCCA TTATATGCGT  
35701 CATAACATTT CTCCTAAAAC ACACGTTTAA CAAGTTGGCA CATTGTGTTA GTTATTAGGT  
35761 AAAAATTGTG TCACTTTTGT AGGTCCTTAT CATGATCCAG TACAGTTTAT AATTCTGAGT  
35821 TCTGATAATC GTTTGGTTAA TTATTTGAAG CATTAGCAC AATGTTAAAC AAAGAGCATT  
35881 ATAAATATTT CGGTCGTAAC ACATATCCTT GTTTGACTGT AGAGACTCTT TATTTGCCCA  
35941 CTGGAAGACT GCCCCTTCAG CTATAAAGA AAAGATCACT TGAACCGACA CATGCTTAAG  
36001 CATGAGGGCA AATTGTTTAG TTGCACCCTG GATGGTTGTG ATATGAGGTT CAGTATGAAG  
36061 GCAGATATGC AACGGCATGT TAAGGAAATC CATGATAGTA AGAACCCTCA TCAATTTGTT  
36121 TGTAAGGAGG ACGGCTGTAA CAAGGTTTTC AGGTATTCAT CAAAGCTGAA GAAACATGAG  
36181 GAATCTCATG GTAGGTCAGC ATTAACCTGA TAATTAAGGAA ATTAATAAAT GCAGAGTGTT  
36241 CATATTACTC ACATCATGTT CATGTAAGT TACAAGTTTT TCATTTGTCC AGCATATTGG  
36301 TTCTCCAAAT TTGAGTTTGT TTCCTTGCAG TTAAATTGGA CTATGTGGAG GTAGTGTGCT  
36361 GTGAGCCAGG TTGCATGAAG ATGTTTCAGAA ATGTTGAATA TCTGAGGGCT CATAACCAAT  
36421 CTTGCCATCA GTATGTTTCTG TGTGAGATAT GTGGAGAAAA GCACCTGAAG AAGAACATCA  
36481 AGCGGCATCT GCAATCACAT GACAAGGTGC CCTCTGATGG AAGGATGAAA TGCCTTTTGT  
36541 ATGGTTGTGA ACACTTCTTT TCCAACGTAA GCAAGATTGG TAGATTTCTG AATGCGCCTA  
36601 TTCAGTTTTT CCAATGATTT CTAAACCAA GCGTATTCCT ATTTTCTATT GCAGAAATCA  
36661 AATCTGACCA AGCATGTCAA GGCATGCCAT GACCAGCTGA AACCTTTCAA GTGCGGAATC  
36721 GTTGGGTGTG GCAAGGCGTT CACCTACAAG CATGTCAGGG ATAACCATGA GACATCTGTT  
36781 GCTCATGTAT ACATGGAAGT GAGTTGTGCT ACCTGATCTA TGTTAATTCC GAGTTTGTGT  
36841 TTTTTGGCCT ATTAGGTCAA ACTATCAGCT CCTGATTTTC GTACGTATCT CTAATTTAAA  
36901 CGTATGTTCA CATCTGCTTT GTGATCAAAC CGTGTGAACC TGTGGATAAC AAAAATCTGC  
36961 TTCATGCAAG GAGACTTTGA AGAGTTGGAT GAGCAGTTGC GTGCCCGGCC AAGAGGTGGT  
37021 CGGAAGAGGA AAGCATTGAC GGTGGAAACA CTGACACGCA AGAGGGTGAC CATCTCCGGC  
37081 GAGGCTTCAT CCTTGATGA TGGAGTGGAG TATCTTCGCT GGTGCTATC TGGTGGGGAT

37141 GATTCAATTG ATTGTCAGTA GCCGGCGTCT TTTTGCTATC ACCGCTGCTT TGTACATGGG  
 37201 TTAGATTATG TAATGTAAGT TGTTTGGTAG ACTACGATGG TGTTTCATGAC GCGTTTGATA  
 37261 TATTGTCAGC AGTATGGTAG TGCAGGGCTC TCATAGTAAA GCTTGCCATT TTTGTTGTAT  
 37321 CTTTAACCCA CGTGGGTCCA GATGATGTGT TTATTCCTAT GTATTTACTT ATCTACATGT  
 37381 ATCCACATGT GCGACTTTGG CGTTTGTGTTG AGATTATAAT CTGTTAAAAT ATGTTGGATT  
 37441 ATATAATTTG GGCAGATTAT AATTCCAAAC AAACACTGAC TAATGCTCTA TTTGTTTACC

Zma\_126352889 (Chr 6 contig)  
 Contains tandem P5SM

Chr 6 Contig 74014..86960

Exons are based upon manual alignment of available ESTs to genomic sequence

76021 TCGTTTATTT CGCTGTGGTT TTGGGGTTAG TCAGACTCAG ATGGGGGAAG GCACAGAGAG  
 76081 CGGCGGCGGG GCGACCACAG CGCCGCCTCT GAGGTATATA AGGTGCTACA AGTGCGGGTT  
 76141 CTGCGACGTG GTCCGGTCCA AGAAGTGCTT GCTCCGCGCC CACGTGCTTG AGCACCACAA  
 76201 GGTACCAGCT GTGCTGCTCG CTTGCTCGCC GCCGCTTGGT TCAGACTTCA GATTTGCGCG  
 76261 CGTTCTCCTT TGTATTGTTT TACAGGGGTA ACACCTATGG GGTGTGTGTA GGATGAGGTG  
 76321 GATGCTTTGG GGGTTACTG GGAAGGTGGA GATGCTGGTC CGCGCAAAGA GATCAGCCGT  
 76381 GCGTGCGAAC AGTGCGGGAT GAGCTTCAAG AAGCAGGCGC ATCTGAAGCA ACATATGCAG  
 76441 AGCCATTGCG TCGAGGTTACT GATCTGGCTG CTTATGTTGG GTTTTTTGGT ATATTGCTCA  
 76501 GTGAATGCTC AGGCTACTAG TGCTCGCCTG GTTTGTTACT ATCCGCTTAA TGTTTATTGT  
 76561 GTGAGAAAAG GCCGAAAGCG AGATACATGC TGGTTTACTT CTTTTGGTGT GGTTGCTACA  
 76621 ACCCTGTTAT AATAACAATT GGTTTCGATGG ATGACTCTGT ATACCTCATG GTCTTTCTTT  
 76681 AGTCCATTGT ATGTTATTAT TAATTATGCT GACTTTTGCA GTCTGTTTGT TCAGATACAG  
 76741 ATGTGTGAAG CATTGGATCT CAAAGAACTC CAAAATGCGA GAAGGCCTTG AACGGACTAG  
 76801 TACCAGGATG GGGAGACCTT CTTGAGAAGC TCCATCAAGA GTTCCTTCAT TCACGCTATT  
 76861 CTTCAGGTTG TGTGTTCTGA GCTATTCTGA GCTGCTTGCT GCTTTTTTTG TTATTATGTT  
 76921 CCTGTACAT GACATATGCT AAAGGTCTAG TCTGAGATTG CGATGCCACT TTTTCAACA  
 76981 AGTTGGGCGT CTGCTGTTCT AGTCATATTT GATAATTGAT GAATTTACAC TGCAATGCTG  
 77041 TTTGAGTATA TCTAGCTGTC ACCGTTTGAT GGCCCTCATT ATTGACAGGA TAGATTTAGC  
 77101 AGGCATAGAG AGACACAATT CCTGTTCTGC ATAGTTTATG TGCTCGACTT TAGTTATGTG  
 77161 TTCACTGAAA TGATTGGATC ATGATCTTCC TTAGTTGAAT TATACATTTT ATGCAAAAAT  
 77221 CAAATTAATT TTCATTTGAA GGTGAGTTAT GCGGATACGG TGTGCTGCTA TTTGCCCTG  
 77281 TATTTGGGGA CTGGTGTACG ACATTTGATT TGCTGGTTTT TGTAGGCAAT TTGTTGACAT  
 77341 ATGAATGCGT GAAGCATTGG ATCCCAAAGA ACTCCAAAAT GCGATAAGGC CTTGAATGGA  
 77401 CTAGTATCAG GATTGGGAGA CCATCCTGAG AAGCTCCATC AAGCATGCCT TGTTACAGCG  
 77461 TTTCTTAAGG TTTGCTCATT TCGTTCCAGC CTTCTCATT TAAGATTTTT CTTTTTATGT  
 77521 TATTATTTAC TTGCACTTTT ATAATTGTAT TTTCTATTAT TTTACACCA CTTAAAGCTC  
 77581 ATGTTGTAGC ATGCCTGGTT GCACTTTGTG GTACTGTTTG CATCTCTATT ACTTTATTTG  
 77641 TATCAAACCT TTTTTTAGGT ACTATATAGT GATACATGTC TTTCCAAAAC TACTGCAGAG  
 77701 GCCCTTTTCC TGCCTGTTG ATGGTTGCC CTTTAGCTAT AGCAGGAAGG ATCATTTGAA  
 77761 CAGACATTTA CTTACTCATG AAGGGAAACT ATTTGTGTGC CCTGTGCAAG GATGTGGCCG  
 77821 TAAGTTCAAT ATCAAGGGTA ATATGCAGAG ACATGTTTCA GAAATCCACA AAGATGTCTC  
 77881 TCCTTGTAAG AGCAAGAAAG AATTCATCTG TCCAAAGGTT AACTGTGGGA AGGCTTTCAA  
 77941 ATATGCTTCT AAGTTAAAGA AACTCAAGA ATCACATGGT GAGAGGCACA CTTTATAACC  
 78001 ATTTCCATAT TTCTGACACC AAGTTTTAAAT AACACACTTT GAAAAGCCTG TTGATATAGT  
 78061 ATATTGATGA TGTTAGCATG TAGTTCTGGT CTTGTTATCC TCTGAGCCAT ATTTATCAAT  
 78121 ATGAACTCTC ACCTTTACCA ATTGTTTTTG TCTTTCTGAT ATGATTATTT TATGTGTTCT  
 78181 GCCTTAGTGC ATGCTTTTCA TCTATTCTGC ATAATATTAT GTATGCAAGT GCTTATTATC  
 78241 AACACTGACA GTAGTTTCTC TGTCATGATA AACTTTTGGT ACCTGTGGTG CAGTCCAGCT  
 78301 GGAATACACA GAAGTTATGT GCTGTGAGCC AGGCTGCATG AAGTTCTTTT CAAACATGGA  
 78361 ATGCCTGAAG GCGCATAACC AATCTTGCCA TCAATATGTT CAGTGTGATA TCTGTGGTAC  
 78421 GAAACAGCTA AAGAAGAATT TCCAGCGCCA TCATCGGATG CATGAAGGTT CCTGCGTCAC  
 78481 TGAGAGGGTT AAATGCCACA TCGAGGACTG CAAATGTTTCT TTCTCGAAGG TGTGGTTTCT  
 78541 AATCTTAACA CTATTTGATT CTCTTATGGT TTGTTTCCGT GGAATTTATC AAGAAAAGCA  
 78601 CTCAGTTATT CATTCTTGGT GAACATGAAA CTGCAGAAAT CCAATTTGGA CAAGCATGTT  
 78661 AAGGCGGTAC ATGAGCAGCG TCGTCCTTTT GTGTGCCAAT TCTCTGGGTG TGGCAAGAGG  
 78721 TTTTCTTACA AGCACGTAAG GGACAATCAT GAGAAGTCAA GCGCTCATGT GCACACTGAG  
 78781 GTATCACAAA TGATCACCTG ATAACAATTT CTTGGCATC CTACATTGTG CTTTCTCCTT  
 78841 CAGAAATGCA TCTTGTGAGG GGGATGTTTA TGATTTCCCA TCAATTGTTT GCAGGGTGAT  
 78901 TTTGTGAGG CTGATGAGCA GCGGCCACGT TCAGTAGGTG GGTGCAAGAG GAAACCCGTA  
 78961 TCTGTTGAGA GTTTGATGCG TAAGAGGGTA GCCGCTCTG ACGATGGGCC TGCTCATGCT

79021 GATGCAACTG AATATTTGAG ATGGCTTCTG TCGGTTTGAT TGGACGTTCA AGTGCACTTT  
79081 GTGTAGTTGG AAACATCAGC GATTTACTTG GCATGTATAG GAAGATGAAT GTCTCTAGTA  
79141 TGTATGTAA ATGTTTATGT ACGGTATCAG AAATACAGAT CATTGGACCT CAATTATAAA  
79201 GGCAATATGC TGTATTGGCA AGATCTTGAA TGTAAGAGCG GTTGCTCATG ATCATTAGAT  
79261 CTATGTGTCT TCAGCACAGC TTGGCAACAT GTTTTGGTAT GTTCGCAGTT GCAGTGTCTT  
79321 TGCCTTTTTT TGCCTCCTGC TGGTTGCAGG TGAAAATTGG ATTCATGATT CTTGAATGCT  
79381 CTTATGTAA ACACAAAATA TCTGTTCAGT TCTCATTGTG CAGAACCACA GCACTCTTCA  
79441 TTCCGATTTG CAGATGCACG TGACCAAAAA AGATAATTTG CAGATGCACC ATGAACCCGT  
79501 GGCACCAGAT GCCCGTCAGC AGCTGGCACC CGTCCAGCTC GCGCCGGAGA GCCTCCAGGC  
79561 GGACCAGCTC CGCCGCCCG CGGATCGATT GGA TAGCGA CGAGGCCGAG ATGCGCACGG  
79621 ACGTCATCGG CGGCGGCGAT GGCTCTTCTG CCTCGGAACT CGGATGCCTC AGTGTGCGTG  
79681 CGCGTGTGAG TGTGATCTCT TGCCTCCAAT GGATCGCGTG CTTCTTTTCT ACGGCGATGA  
79741 TGGCTTAGTT AAAGCCCAGT AGTTTGAGT AGTGAGCTCA GAGCCCAATA AACTCCAGTA  
79801 ATGGGCTCCG AAGATTAATA GGCCGTTAGC AAATTAATCA CTTCAATTTG ATGGCATGGG  
79861 GATCCTCCCA AAAAAATTGA ATGGGCTGAG AAACGCTTGT TGCATGGACC TTCGACAGCC  
79921 CCAGGACGTT TCTCATGAAA TTTCTATTAT ATGAAAGGCG GTTCAAACG ACTCCATTG  
79981 TGGTGTCTAA GTCGTTCTTT TTATTTAGAC CGTTCGATCC CATCTCAATG GTATGCATCG

**SUPPLEMENTARY TABLE 1. Sequences of DNA primers**

| <b>DNA templates for <i>in vitro</i> transcription</b> |                                                                     |                  |
|--------------------------------------------------------|---------------------------------------------------------------------|------------------|
|                                                        | <i>A. thaliana</i> P5SM, minimal (nucleotides 649-793 of AT1G72050) |                  |
| DNA1                                                   | 5' -TAATACGACTCACTATAGGTCTTACCTATGTTATTGCG                          | For, T7 promoter |
| DNA2                                                   | 5' -CTCAAACATTTTGC GTGATCG                                          | Rev              |
|                                                        | <i>A. thaliana</i> P5SM RNA (nucleotides 603-810 of AT1G72050)      |                  |
| DNA3                                                   | 5' -TAATACGACTCACTATAGGTTTATACATTTGCAGGAAATAA                       | For, T7 promoter |
| DNA4                                                   | 5' -GCTATTGAACATCAGACCTC                                            | Rev              |
|                                                        | <i>O. sativa</i> P5SM RNA_1 (nucleotides 903-1109 of Os05g0121400)  |                  |
| DNA5                                                   | 5' -TAATACGACTCACTATAGGTTGGGTAGGTTTGTGATCTA                         | For, T7 promoter |
| DNA6                                                   | 5' -GCAACAGAAGAAATCACCTGAAG                                         | Rev              |
|                                                        | <i>O. sativa</i> P5SM RNA_2 (nucleotides 1500-1693 of Os05g0121400) |                  |
| DNA7                                                   | 5' -TAATACGACTCACTATAGGCCTATTGTGGTTTCTGATATATT                      | For, T7 promoter |
| DNA8                                                   | 5' -TTTCAAATGAACAAGCAAACCTG                                         | Rev              |
|                                                        | <i>A. thaliana</i> 5S gene (CIC YAC 6A1, <sup>8</sup> )             |                  |
| DNA9                                                   | 5' -CGTGATTTGGGCTATATTACG                                           | For              |
| DNA10                                                  | 5' -CAGTCTACAAGTTATCGAGTCATA                                        | Rev              |
|                                                        | <i>A. thaliana</i> 5S rRNA                                          |                  |
| DNA11                                                  | 5' -TAATACGACTCACTATAGGATGCGATCATACCAGC                             | For, T7 promoter |
| DNA12                                                  | 5' -GAGGGATGCAACACGAG                                               | Rev              |
|                                                        |                                                                     |                  |
| <b>RT-PCR analysis</b>                                 |                                                                     |                  |
|                                                        | TFIIIA (AT1G72050) from <i>A. thaliana</i>                          |                  |
| a (DNA13)                                              | 5' -atgcggtaccGTGCGGCGTCTTGATGGA                                    | For, BamHI       |
| b (DNA14)                                              | 5' -ACTCTTGCAGTTCTCCTTCG                                            | Rev              |
| e (DNA15)                                              | 5' -GGCACGGGCAGCTTACCGGTGGTGCATATGAACTTCAGGGT                       | Rev (EGFP)       |
|                                                        | TFIIIA (Os02G0116000) from <i>O. sativa</i>                         |                  |
| c (DNA16)                                              | 5' -TGATGGAGACATGAGGGTTG                                            | For              |
| d (DNA17)                                              | 5' -TGTTACAGCCCTCCTCCTTG                                            | Rev              |
|                                                        | TFIIIA (Os05G0121400) from <i>O. sativa</i>                         |                  |
| DNA18                                                  | 5' -ATGATTACTTGGGACGTGGT                                            | For              |
| DNA19                                                  | 5' -GTCTTCCCACAGTTTTCTC                                             | Rev              |
|                                                        |                                                                     |                  |
| <b>qRT-PCR analysis</b>                                |                                                                     |                  |
|                                                        | TFIIIA transcripts retaining exon (SP-II and unspliced*)            |                  |
| DNA20                                                  | 5' -TTATTGCGTGAGGCATTGGA                                            | For              |
| DNA21                                                  | 5' -TCTCAGGAGGTCTCCCAACCT                                           | Rev              |
|                                                        | TFIIIA transcripts skipping exon (SP-I)                             |                  |
| DNA22                                                  | 5' -TGTCAGAATGTGGTGCTGA                                             | For              |
| DNA23                                                  | 5' -GTAAAAGATCTCTCGAGCGAATG                                         | Rev              |
|                                                        | DsRED transcripts (reference)                                       |                  |
| DNA24                                                  | 5' -AGACCCACAAGGCCCTGAA                                             | For              |
| DNA25                                                  | 5' -CAGCTGCACGGGCTTCTT                                              | Rev              |
|                                                        |                                                                     |                  |
| <b>Cloning of reporter constructs</b>                  |                                                                     |                  |
|                                                        | 5' fragment of TFIIIA (Pre-EGFP, I-EGFP, II-EGFP)                   |                  |
| DNA26                                                  | 5' -atgcggtaccGTGCGGCGTCTTGATGGA                                    | For, KpnI        |
| DNA27                                                  | 5' -agcttctagaATCCACATAGCAAGTAAAAGA                                 | Rev, XbaI        |
|                                                        | EGFP without start codon                                            |                  |

|                                                         |                                                                                                                                        |                         |
|---------------------------------------------------------|----------------------------------------------------------------------------------------------------------------------------------------|-------------------------|
| DNA28                                                   | 5' -agctt <b>tctaga</b> GTGAGCAAGGGCGAGGA                                                                                              | For, XbaI               |
| DNA29                                                   | 5' -agct <b>gtcgcac</b> TTACTTGTACAGCTCGTCCATGC                                                                                        | Rev, Sall               |
|                                                         | Flag tag insertion in frame within N-terminal coding region                                                                            |                         |
| DNA30                                                   | atgc <b>cctcgag</b> GACTACAAAGACGATGATGACAAG <b>cctcgag</b> atgc                                                                       | For, XhoI, XhoI         |
| DNA31                                                   | gcat <b>cctcgag</b> CTTGTTCATCATCGTCTTTGTAGT <b>cctcgag</b> gcat                                                                       | Rev, XhoI, XhoI         |
|                                                         |                                                                                                                                        |                         |
| <b>Cloning of protein coding sequences</b>              |                                                                                                                                        |                         |
|                                                         | TFIIIA cDNA (AT1G72050) from <i>A. thaliana</i>                                                                                        |                         |
| DNA32                                                   | 5' -gac <b>ggatcc</b> ATGGCGGAAGAAGCTAAAG                                                                                              | For, BamHI              |
| DNA33                                                   | 5' -gac <b>gtcgcac</b> CTAGCAAGTTTCGTGTTCTTC                                                                                           | Rev, Sall               |
|                                                         | L5 cDNA (AT3G25520) from <i>A. thaliana</i>                                                                                            |                         |
| DNA34                                                   | 5' -gac <b>ggatcc</b> ATGGTGTTTGTGAAGTCCACC                                                                                            | For, BamHI**            |
| DNA35                                                   | 5' -gac <b>gtcgcac</b> TAAAGAAGGCTTGACTGATTTACTCTTC                                                                                    | Rev, Sall               |
| DNA36                                                   | 5' -atg <b>cagatc</b> tATGGTGTTTGTGAAGTCCACC                                                                                           | For, BglII              |
|                                                         | L7A cDNA (AT1G80750) from <i>A. thaliana</i>                                                                                           |                         |
| DNA37                                                   | 5' -atgc <b>ggatcc</b> ATGGCTGAGGAAGAAGCTAA                                                                                            | For, BamHI              |
| DNA38                                                   | 5' -atgc <b>gtcgcac</b> CTAATTCATTTTGCTGATGAGA                                                                                         | Rev, Sall               |
|                                                         | L7B cDNA (AT2G01250) from <i>A. thaliana</i>                                                                                           |                         |
| DNA39                                                   | 5' -atgc <b>ggatcc</b> ATGGTTGAGTCAAAGGTTGT                                                                                            | For, BamHI              |
| DNA40                                                   | 5' -atgc <b>gtcgcac</b> CTAATTCATCCTCCTGATAAGC                                                                                         | Rev, Sall               |
|                                                         | N-terminal Flag tag w/ start codon and BamHI overhangs                                                                                 |                         |
| DNA41                                                   | <b>gatcc</b> ATGGACTACAAAGACGATGATGACAAG <b>g</b>                                                                                      | For, BamHI, <u>Flag</u> |
| DNA42                                                   | <b>gatcc</b> CTTGTTCATCATCGTCTTTGTAGTCCAT <b>g</b>                                                                                     | Rev, BamHI, <u>Flag</u> |
|                                                         | Primer containing N-terminal Flag tag w/ start codon and overlap 5' end of L5 cDNA (internal BamHI site prevents use of above primers) |                         |
| DNA43                                                   | atgc <b>agatc</b> tATGGACTACAAAGACGATGATGACAAG<br>ATGGTGTTTGTGAAGTCC                                                                   | For, BglII, <u>Flag</u> |
|                                                         |                                                                                                                                        |                         |
|                                                         |                                                                                                                                        |                         |
| <b>P5SM mutant constructs by two-piece PCR ligation</b> |                                                                                                                                        |                         |
|                                                         | M1 (template TOPO-DNA26/27 PCR)                                                                                                        |                         |
| DNA44                                                   | 5' -GTAGCCTCGCCTCACGCAATAACATAGG                                                                                                       | 5' seg, w/ DNA3         |
| DNA45                                                   | 5' -GCGTGAGGCGAGGCTACATGTTATGGAC                                                                                                       | 3' seg, w/ DNA4         |
|                                                         | M2 (template TOPO-DNA26/27 PCR)                                                                                                        |                         |
| DNA46                                                   | 5' -GCTTACTTGCTATAACATGTAGCCTCGCATTTTGG                                                                                                | 5' seg, w/ DNA3         |
| DNA47                                                   | 5' -GCTACATGTTATAGCAAGTAAGCCTCGATCACG                                                                                                  | 3' seg, w/ DNA4         |
|                                                         | M3 (template TOPO-DNA26/27 PCR)                                                                                                        |                         |
| DNA48                                                   | 5' -CGCATTGGAGTTCTCTCTTTGGGATCC                                                                                                        | 5' seg, w/ DNA3         |
| DNA49                                                   | 5' -CTCCAATGCGAGGCTACATGTTATGGAC                                                                                                       | 3' seg, w/ DNA4         |
|                                                         | M4 (template TOPO-DNA26/27 PCR)                                                                                                        |                         |
| DNA50                                                   | 5' -GGGATGGAATGCCTCACGCAATAACATAGG                                                                                                     | 5' seg, w/ DNA3         |
| DNA51                                                   | 5' -CATTCCATCCCAAAGAGAGAACTCCAAAATGC                                                                                                   | 3' seg, w/ DNA4         |
|                                                         | M5 (template TOPO-DNA26/27 PCR)                                                                                                        |                         |
| DNA52                                                   | 5' -GGGAAGGTATGCCTCACGCAATAACATAGG                                                                                                     | 5' seg, w/ DNA3         |
| DNA53                                                   | 5' -CATACTTCCCAAAGAGAGAACTCCAAAATGC                                                                                                    | 3' seg, w/ DNA4         |
|                                                         | M6 (template TOPO-M4)                                                                                                                  |                         |
| DNA54                                                   | CATTTTCCAGTTCTCTCTTTGGGATGGAATGC                                                                                                       | 5' seg, w/ DNA3         |
| DNA55                                                   | GAACTGGAAAATGCGAGGCTACATGTTATGG                                                                                                        | 3' seg, w/ DNA4         |
|                                                         | M7 (template TOPO-M5)                                                                                                                  |                         |
| DNA56                                                   | CATTACCTGTTCTCTCTTTGGGAAGGTATGC                                                                                                        | 5' seg, w/ DNA3         |

|       |                                        |                 |
|-------|----------------------------------------|-----------------|
| DNA57 | <i>GAACAGGTAAATGCGAGGCTACATGTTATGG</i> | 3' seg, w/ DNA4 |
|       | <b>M8 (template TOPO-DNA26/27 PCR)</b> |                 |
| DNA58 | <i>GAGTTCTGATGGGATCCAATGCCTCACG</i>    | 5' seg, w/ DNA3 |
| DNA59 | <i>GATCCCATCAGAACTCCAAAATGCGAGGC</i>   | 5' seg, w/ DNA4 |

Italicized sequence includes T7 promoter sequence for *in vitro* transcription; lowercase sequence includes overhang and restriction digest sites (bold) indicated

\*The unspliced pre-mRNA is not observed by RT-PCR, and so should contribute negligibly to the transcript abundance measured by qRT-PCR.

\*\*The L5 cDNA sequence contains a BamHI site at nucleotide position 104; a partial digest with BamHI could be performed and the larger DNA product isolated, or the restriction site could be switched to BglII (DNA34), which results in a digested end compatible with the BamHI cloning site.

## SUPPLEMENTARY METHODS

### Cloning of DNA constructs

Reporter constructs containing the 5' region of either the unspliced pre-mRNA (Pre-EGFP) or the two splice variants (I-EGFP and II-EGFP) of TFIIIA from *A. thaliana* fused to the cDNA of enhanced green fluorescent protein (EGFP) were cloned into the binary vector pBinAR<sup>12</sup>. The TFIIIA 5' regions starting from the 5' UTR and extending to the exon downstream of P5SM were PCR amplified with primers DNA26 and DNA27 from *A. thaliana* genomic DNA or cDNA, then the resulting DNA products were subjected to restriction digest with KpnI and XbaI. EGFP cDNA was PCR amplified with primers which skip the start codon of EGFP, and the resulting DNA product was subjected to restriction digest with XbaI and Sall. To generate in-frame fusion constructs, the different TFIIIA fragments were ligated with EGFP cDNA through the common XbaI ends. The resulting products were cloned into the KpnI/Sall sites of pBinAR. For insertion of a Flag tag into these reporter constructs, two complementary oligonucleotides encoding the Flag peptide sequence (DYKDDDDK) flanked by XhoI sites were annealed, subjected to restriction digest, and cloned in-frame into a natural XhoI site within the 5' part of the TFIIIA coding sequence (annotated in **Supplementary Fig. 4**).

For cloning of Pre-EGFP reporter constructs with mutations in P5SM, first the 5' region of wild-type TFIIIA gene was PCR amplified with primers DNA26 and DNA27. The resulting product was cloned into EcoRV linearized vector pBluescript II SK (Stratagene) via blunt end ligation. PCR mutagenesis was performed on the plasmid containing the TFIIIA fragment and, after sequence confirmation, the fragment was released by restriction digest with KpnI and Sall for use in cloning with EGFP into pBINAR as described above.

Various proteins were co-expressed with TFIIIA reporter constructs to assess effects on reporter activity. Their respective sequences were amplified by PCR from *A. thaliana* cDNA and after restriction digest, cloned into the BamHI/Sall sites of pBINAR. Cloning of control constructs containing luciferase (LUC) or DsRED2 were described previously<sup>13</sup>. For introduction of an N-terminal Flag tag, two complementary oligonucleotides encoding a start codon followed by the Flag peptide sequence flanked by sequences with BamHI-compatible overhangs were annealed and cloned in-frame into the BamHI site immediately 5' of the protein coding region. Since the L5 coding region contains a BamHI site, the Flag tag was instead introduced as an extended overhang to the 5' primer complementary to L5 (DNA43).

### Additional notes on non-denaturing gel shift assays

Renaturation of the RNA before performing the assay was found to be important to reduce the amount of alternatively folded forms, as sometimes observed by the appearance of multiple RNA bands in the absence of added protein. Gels below 6% acrylamide are not able to resolve these multiple bands, and it is possible that even at 10% acrylamide there are still unresolved bands. Some of these alternatively folded P5SM RNAs apparently do not bind GST-AfL5 and therefore are unaffected by addition of protein. We observe with the renaturation protocol that saturated binding of the RNA by protein usually is reached with ~60-70% of P5SM RNA bound and shifted. To calculate the dissociation constant for the RNA-protein interaction, the percentage bound was normalized to this empirically observed maximal binding. We and others<sup>9</sup> have observed a similar effect for *A. thaliana* 5S rRNA, in which saturated binding is reached with some of the RNA remaining unshifted.



## References

1. Weinberg, Z. et al. Identification of 22 candidate structured RNAs in bacteria using the CMfinder comparative genomics pipeline. *Nucleic Acids Res* **35**, 4809-19 (2007).
2. Swarbreck, D. et al. The *Arabidopsis* Information Resource (TAIR): gene structure and function annotation. *Nucleic Acids Res* **36**, D1009-14 (2008).
3. Tanaka, T. et al. The Rice Annotation Project Database (RAP-DB): 2008 update. *Nucleic Acids Res* **36**, D1028-33 (2008).
4. Jaillon, O. et al. The grapevine genome sequence suggests ancestral hexaploidization in major angiosperm phyla. *Nature* **449**, 463-7 (2007).
5. Lang, D., Eisinger, J., Reski, R. & Rensing, S.A. Representation and high-quality annotation of the *Physcomitrella patens* transcriptome demonstrates a high proportion of proteins involved in metabolism in mosses. *Plant Biol (Stuttg)* **7**, 238-50 (2005).
6. Chenna, R. et al. Multiple sequence alignment with the Clustal series of programs. *Nucleic Acids Res* **31**, 3497-500 (2003).
7. Katoh, K., Hori, H. & Osawa, S. The nucleotide sequences of 5S ribosomal RNAs from four *Bryophyta* species. *Nucleic Acids Res* **11**, 5671-5674 (1983).
8. Cloix, C. et al. Analysis of the 5S RNA pool in *Arabidopsis thaliana*: RNAs are heterogeneous and only two of the genomic 5S loci produce mature 5S RNA. *Genome Res* **12**, 132-144 (2002).
9. Mathieu, O. et al. Identification and characterization of transcription factor IIIA and ribosomal protein L5 from *Arabidopsis thaliana*. *Nucleic Acids Res* **31**, 2424-2433 (2003).
10. Schmeing, T.M., Moore, P.B. & Steitz, T.A. Structures of deacylated tRNA mimics bound to the E site of the large ribosomal subunit. *RNA* **9**, 1345-52 (2003).
11. Lee, Y. & Nazar, R.N. Terminal structure mediates 5 S rRNA stability and integration during ribosome biogenesis. *J Biol Chem* **278**, 6635-41 (2003).
12. Hofgen, R. & Willmitzer, L. Biochemical and genetic analysis of different patatin isoforms expressed in various organs of potato (*Solanum tuberosum*). *Plant Sci* **66**, 221-230 (1990).
13. Wachter, A. et al. Riboswitch control of gene expression in plants by splicing and alternative 3' end processing of mRNAs. *Plant Cell* **19**, 3437-50 (2007).
